1  
2  
3  
4  
5  
6  
7  
8  
9  
10  
11  
12  
13  
14  
15  
16  
17  
18  
19  
20  
21  
22  
23  
24  
25

## Connexin 43 confers chemoresistance through activating PI3K

Kevin J Pridham<sup>1</sup>, Farah Shah<sup>1,3</sup>, Kevin L Sheng<sup>2</sup>, Sujuan Guo<sup>1</sup>, Min Liu<sup>1</sup>, Pratik Kanabur<sup>1,3</sup>, Samy Lamouille<sup>1,4,5</sup>, Gabrielle Lewis<sup>1</sup>, Marc Morales<sup>1</sup>, Jane Jourdan<sup>1</sup>, Christina L Grek<sup>6</sup>, Gautam G Ghatnekar<sup>6</sup>, Robin Varghese<sup>2</sup>, Deborah F Kelly<sup>7,8,9</sup>, Robert G Gourdie<sup>1,10,11\*</sup>, and Zhi Sheng<sup>1,3,11\*</sup>

1. Fralin Biomedical Research Institute at VTC, Roanoke, VA 24016, USA
2. Department of Biomedical Affairs and Research, Edward Via College of Osteopathic Medicine, Blacksburg, VA 24060, USA
3. Department of Internal Medicine, Virginia Tech Carilion School of Medicine, Roanoke, VA 24016, USA
4. Department of Basic Science Education, Virginia Tech Carilion School of Medicine, Roanoke, VA 24016, USA
5. Department of Biological Sciences, Virginia Tech, Blacksburg VA 24061, USA
6. FirstString Research, Inc., Mount Pleasant, SC 29464, USA
7. Department of Biomedical Engineering, Pennsylvania State University, University Park, PA 16802, USA
8. Huck Institutes of the Life Sciences, Pennsylvania State University, University Park, PA 16802, USA
9. Center for Structural Oncology, Pennsylvania State University, University Park, PA 16802, USA
10. Department of Emergency Medicine, Virginia Tech Carilion School of Medicine, Roanoke, VA 24016, USA
11. Faculty of Health Science, Virginia Tech, Blacksburg, VA 24061, United States

\*Corresponding authors: Zhi Sheng, Fralin Biomedical Research Institute, 2 Riverside Circle, Roanoke, VA 24016. Phone: 540-526-2042; E-mail: [zhisheng@vtc.vt.edu](mailto:zhisheng@vtc.vt.edu); and Robert Gourdie, Fralin Biomedical Research Institute, 2 Riverside Circle, Roanoke, VA 24016. Phone: 540-526-2095; E-mail: [gourdier@vtc.vt.edu](mailto:gourdier@vtc.vt.edu).

**Running title:** Cx43/PI3K and chemoresistance

**Keywords:** Cx43, PI3K, chemoresistance, PI3KCB/p110 $\beta$ , temozolomide, glioblastoma

26 **ABSTRACT**

27 Circumventing chemoresistance is crucial for effectively treating glioblastoma due to limited  
28 therapeutic options. The gap junction protein connexin 43 (Cx43) renders glioblastoma resistant to the  
29 frontline chemotherapy temozolomide; however, targeting Cx43 is difficult because mechanisms  
30 underlying Cx43-mediated chemoresistance remain elusive. Here we show that Cx43, but not other  
31 connexins, is highly expressed in glioblastoma and strongly correlates with poor patient prognosis and  
32 chemoresistance, making Cx43 the prime therapeutic target among all connexins. The intracellular  
33 carboxyl terminus of Cx43 binds to phosphatidylinositol 3-kinase (PI3K) catalytic subunit  $\beta$  (PIK3CB, also  
34 called PI3K $\beta$  or p110 $\beta$ ), thereby activating PI3K signaling independent of Cx43-channels and  
35 subsequently inducing temozolomide resistance. A combination of  $\alpha$ CT1, a Cx43-targeting peptide  
36 inhibitor, and PIK3CB-selective inhibitors restores temozolomide sensitivity *in vitro* and *in vivo*. This study  
37 not only reveals novel mechanistic insights into chemoresistance in glioblastoma, but also demonstrates  
38 that targeting Cx43 and PIK3CB/p110 $\beta$  is an effective approach for overcoming chemoresistance.

39

40 Overcoming resistance to chemotherapy such as temozolomide (TMZ) has proven perplexing  
41 and remains a key unmet clinical need. As an alkylating agent, TMZ reacts with DNA at multiple sites,  
42 yielding O<sup>6</sup>-methylguanine lesions that subsequently induce DNA breaks and eventually cell death (1).  
43 Given that TMZ is able to pass the blood-brain barrier (2), this drug has been used as the frontline  
44 chemotherapy for glioblastoma (GBM), an aggressive and lethal cancer that accounts for approximately  
45 half of all malignant brain tumors and has a grim prognosis with an average survival time of 14.6 months  
46 (3, 4). Adding to this dismal outcome, nearly 90% of patients with GBM succumb to tumor recurrence  
47 and the average survival for recurrent GBM is about 5.5-7.5 months due to limited therapeutic options  
48 and resistance to TMZ (5). Hence, overcoming TMZ resistance is key to effectively treating GBM and  
49 curbing GBM progression. Poor responses of nearly 50% of GBM patients to TMZ are due to the  
50 expression of O-6-methylguanine-DNA methyltransferase (MGMT) (6, 7). MGMT repairs TMZ-induced  
51 DNA damage, conferring MGMT-dependent TMZ resistance; as such, inhibiting MGMT has shown  
52 encouraging clinical benefits (8). Patients with no MGMT expression also develop MGMT-independent  
53 resistance to TMZ (9, 10). Factors involved in MGMT-independent TMZ resistance include the DNA  
54 mismatch repair pathway and genetic alterations (11, 12). However, targeting these factors to circumvent  
55 TMZ resistance has been a daunting task. Deeper insights into MGMT-independent TMZ resistance are  
56 therefore needed.

57 Recently, several lines of evidence have indicated that the gap junction protein connexin 43 (Cx43;  
58 also known as gap junction protein A1, *GJA1*), a channel-forming protein important for intercellular  
59 communication (13), controls the response of GBM cells to TMZ. Ectopic expression of Cx43 renders  
60 GBM cells resistant to TMZ (14-17) and blocking Cx43 using different approaches such as antibodies or  
61 channel inhibitors restores TMZ sensitivity (14-20). However, it remains unclear whether Cx43-mediated  
62 TMZ resistance depends on MGMT. Our recent work (21) reveals that high levels of Cx43 in MGMT-  
63 deficient GBM cell lines and primary patient samples correlate with poor responses to TMZ and that  $\alpha$ CT1,  
64 a clinically-tested therapeutic peptide that comprises the Cx43 carboxyl terminus (CT) and an  
65 antennapedia cell-penetrating sequence (22), antagonizes TMZ resistance. Our results have been  
66 verified by an independent study using nanoparticle-conjugated  $\alpha$ CT1 (23). Nonetheless, the molecular  
67 underpinnings of Cx43-mediated TMZ resistance remains elusive, making it difficult to effectively target  
68 Cx43 to treat GBM.

69 In this report, we determined the role of connexins in GBM prognosis and TMZ resistance,  
70 explored how Cx43 activates phosphatidylinositol-3 kinase (PI3K) independent of Cx43 channels and  
71 induces TMZ resistance, and examined a candidate triple combinational therapy entailing the Cx43

72 inhibitor  $\alpha$ CT1, PI3K-selective inhibitors, and TMZ in preclinical studies for its effectiveness in overcoming  
 73 TMZ resistance.

74 **Results**

75 **Cx43, but not other connexins, is highly expressed in GBM and correlates with poor prognosis**  
 76 **and chemoresistance**

77 There are 21 known connexins (Supplemental Table 1). Whether all these connexins are equally  
 78 important for GBM survival and chemoresistance has not yet been explored. To address this, we queried  
 79 publicly available online GBM databases including: The Cancer Genome Atlas (TCGA;  
 80 <https://www.cancer.gov/tcga>), Gliovis (24), Chinese Glioma Gene Atlas (CGGA), and the Cancer  
 81 Dependency Map (DepMap) (25). Cx43 mRNA was consistently expressed at the highest level among  
 82 all connexins in primary GBM tumors from six different datasets (Fig. 1A-E and Supplemental Fig. S1A-

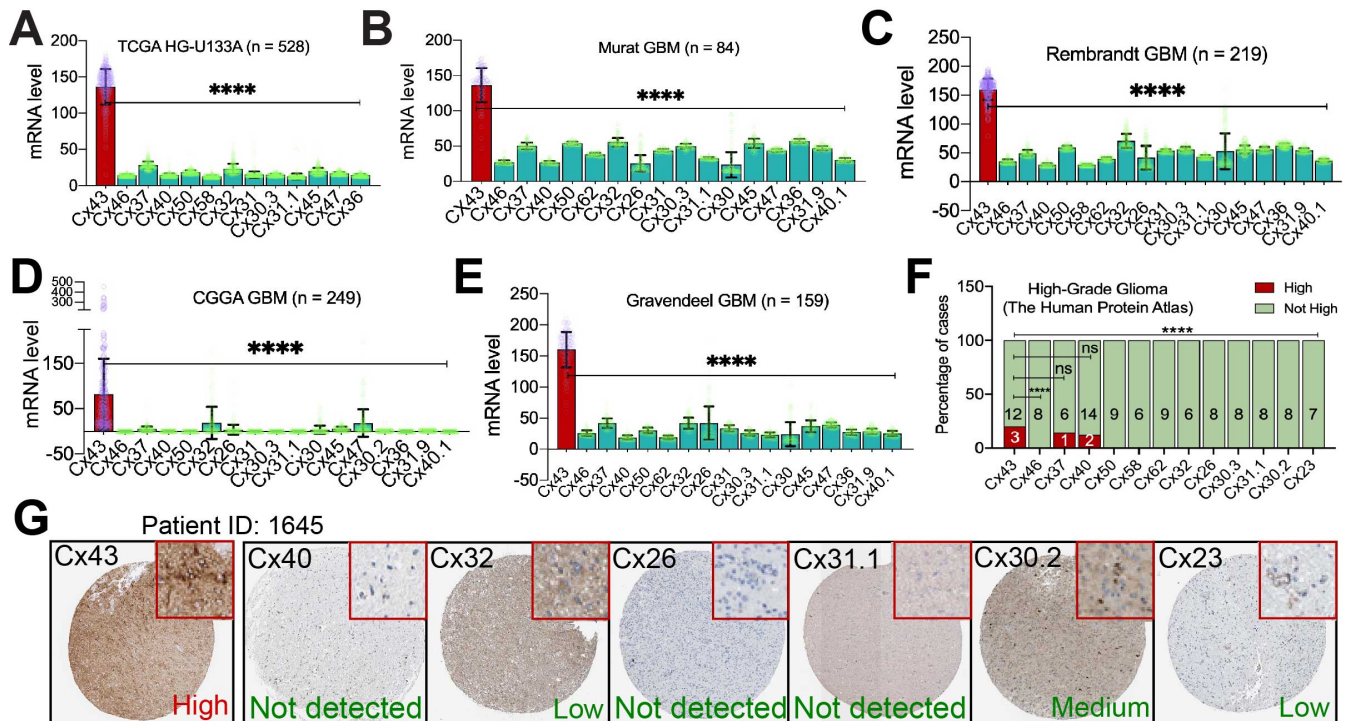

**Fig. 1. Cx43 is expressed at the highest level among all connexins in GBM.** mRNA levels of connexins in GBMs from The Cancer Genome Atlas (TCGA; **A**), Murat (**B**), Rembrandt (**C**), Chinese Glioma Gene Atlas (CGGA; **D**), and Gravendeel (**E**). Shown are average reads of microarray or RNAseq. Cx43 is presented as red bars with purple data points. Other connexins are labeled as green bars and yellow data points. Error bars are either standard deviations or standard errors. (**F**) Staining scores of connexins in high-grade glioma. Case numbers with high (red) or not high (green) levels of connexins are shown. (**G**) Histological images of connexins in a high-grade glioma tumor. Inset images (highlighted in red) were cropped from original images in order to highlight immunostaining details. GBM datasets were retrieved from cBioPortal, Gliovis, or CGGA data portal. Immunostaining results of high-grade glioma were obtained from the Human Protein Atlas. Statistical analyses: One-Way ANOVA and Fisher's exact test. ns: not significant; \*\*\*\*:  $P < 0.0001$ .

83 C) and 54 GBM cell lines (Supplemental Fig. S1D). Notable, despite that different connexins were  
84 detected in these studies, levels of Cx43 mRNA were significantly higher than other connexins ( $P <$   
85  $0.0001$ ). Based on immunostaining results retrieved from The Human Protein Atlas (26), levels of Cx43  
86 protein in high-grade glioma were also significantly higher than other connexins, except Cx37 or Cx40  
87 (**Fig. 1F**). In Cx43-high tumors, other connexins were scored as either not detected, low, or medium in  
88 the same tumor (**Fig. 1G** and Supplemental Fig. S2), suggestive of a dominant expression of Cx43.  
89 Collectively, Cx43 is expressed at the highest level among all connexins in GBM and high-grade glioma.

90 Kaplan-Meier analyses (**Fig. 2A** and Supplemental Fig. S3A) revealed that high levels of Cx43  
91 mRNA were associated with poor prognosis of GBM patients (All GBM). However, the lifespan of Cx43-  
92 high primary GBM was not significantly shorter than Cx43-low primary GBM (Primary GBM,  $P > 0.05$ ).  
93 This is perhaps due to the fact that 50% of primary GBM express MGMT (6) and that Cx43 correlates  
94 with the survival of MGMT-deficient patients (21). Indeed, in MGMT-deficient/TMZ-untreated primary  
95 GBMs, high levels of Cx43 correlated with poor prognosis (MGMT-/TMZ-,  $P < 0.05$ ), whereas Cx43  
96 levels had no relationship with the survival of MGMT+/TMZ- GBM patients ( $P > 0.05$ ). It was not  
97 surprising that Cx43-high recurrent GBM patients exhibited a dismal prognosis (Recurrent GBM),  
98 because recurrent GBMs are often refractory to TMZ (5). Similar results were found in multiple GBM  
99 datasets (Supplemental Fig. S3A and S4A). To compare Cx43 with other connexins, we performed Cox  
100 univariate analyses, which yield a hazard ratio (HR) that determines chance of death (HR  $> 1$  indicates  
101 high risk of death). Consistent with the results of Kaplan-Meier analyses (**Fig. 2A**), Cx43-high patients  
102 had considerably high HRs in the group of All GBM, MGMT-/TMZ-, and Recurrent GBM. In contrast,  
103 most of other connexins failed to display a notably high risk of death in all three groups (**Fig. 2B** and  
104 Supplemental Fig. S3B and S4B). Cx43 is therefore the only connexin that correlates with poor prognosis  
105 of MGMT-deficient GBM.

106 Previous research has demonstrated that TMZ improves prognosis of GBM patients when used  
107 in combination with radiation (6). To determine how connexins contribute to this treatment regime,  
108 MGMT-deficient GBM patients treated with radiation (Radio) were compared to patients treated with  
109 radiation and TMZ (Radio+TMZ) or radiation and chemo (Radio+chemo) (**Fig. 2C** and Supplemental  
110 Figure S5). While the addition of TMZ or chemo did increase the survival of both Cx43-high and Cx43-  
111 low patients, there was no statistically significant difference between these treatments in the Cx43-high  
112 group in three GBM datasets ( $P > 0.05$ ), suggesting that Cx43-high patients are resistant to TMZ. Of note,  
113 levels of Cx37, Cx47, or Cx31.9 did not consistently correspond to the risk of death in three datasets (**Fig.**  
114 **2D**). Together, our results demonstrate that Cx43 is expressed at the highest level among all connexins  
115 in GBM and contributes to chemoresistance as well as poor prognosis of MGMT-deficient GBMs.

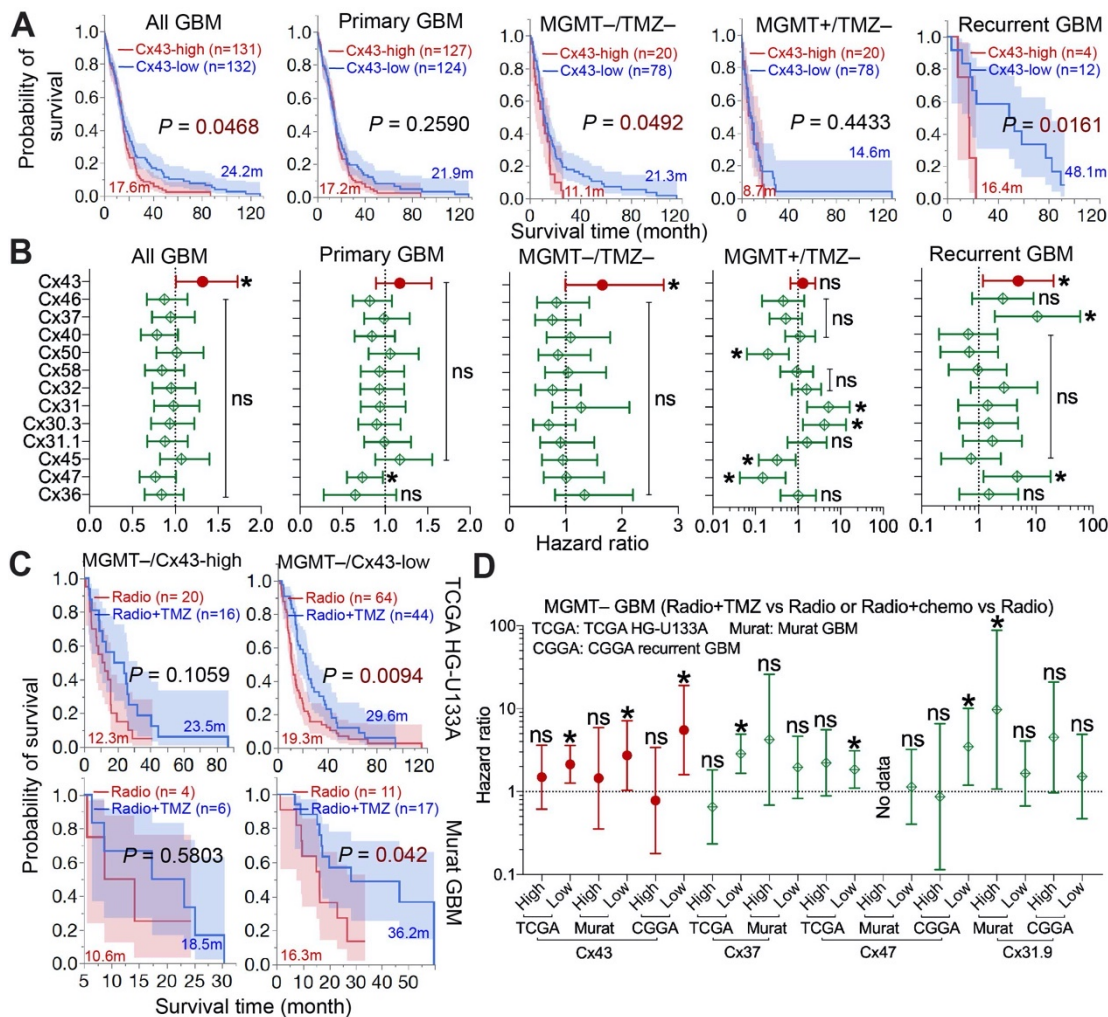

**Fig. 2. Cx43, but not other connexins, correlates with GBM poor prognosis and chemoresistance.** GBM datasets were retrieved from cBioPortal, GlioVis, or CGGA data portal. Immunostaining results of high-grade glioma were obtained from the Human Protein Atlas. **(A)** Kaplan-Meier analysis in the TCGA HG-U133A microarray dataset. Patients were divided into Cx43-high (red; top 25 percentile) or Cx43-low (blue; bottom 25 or 75 percentile) based upon Cx43 mRNA levels in primary, secondary, and recurrent GBM (All GBM), primary GBM only (Primary GBM), MGMT-deficient/TMZ-untreated primary GBM (MGMT-/TMZ-), MGMT-expressing/TMZ-untreated primary GBM (MGMT+/TMZ-), or recurrent GBM only (Recurrent GBM). Case number (n), mean survival time in months (m), and log-rank P values are shown. Red or blue shadows represent 95% confidence interval of Cx43-high or Cx43-low group, respectively. **(B)** Cox univariate analysis in the TCGA HG-U133A microarray dataset. The Cox univariate analysis employs the Cox proportional hazards model to yield a hazard ratio that indicates risk levels of death in patients with high levels of connexins compared to those with low levels. The resulting P value determines significance of hazard ratio. Cx43 is highlighted in red. **(C)** Kaplan Meier analysis in TCGA HG-U133A and Murat GBM. MGMT-deficient primary GBMs were divided into Cx43-high or Cx43-low group as described above. Patients treated with radiation alone (Radio; red) were compared to patients treated with both radiation and TMZ (Radio+TMZ; blue). **(D)** Cox univariate analysis in TCGA HG-U133A, Murat GBM, and CGGA recurrent GBM. MGMT-deficient primary GBMs or recurrent GBMs were divided into Cx43-high or Cx43-low group. One-Way ANOVA was used to determine statistical significance. \*:  $P < 0.05$ . \*\*\*\*:  $P < 0.0001$ . ns: not significant.

## 117 Cx43 confers resistance to TMZ through activating PI3K

118 Next, we explored how Cx43 confers TMZ resistance. We have previously shown that the Cx43  
 119 peptide inhibitor  $\alpha$ CT1 inactivates PI3K (21), leading us to hypothesize that Cx43 activates PI3K to induce  
 120 TMZ resistance. To test this hypothesis, we treated Cx43-high/TMZ-resistant U87MG cells with TMZ or  
 121  $\alpha$ CT1.  $\alpha$ CT1 blocked phosphorylation of Cx43 at serine 368 (**Fig. 3A**, pCx43-S368), a phosphorylation  
 122 site critical for Cx43 activity (27). As expected,  $\alpha$ CT1 induced a 5-fold decrease of the phosphorylated  
 123 form of AKT serine/threonine kinase (AKT; **Fig. 3A**, pAKT-S473) indicative of a strong inhibition of PI3K.  
 124 Previous research (28, 29) has suggested that Cx43 regulates the activity of the mitogen-activated  
 125 protein kinase (MAPK) pathway, including the RAF proto-oncogene serine/threonine-protein kinase

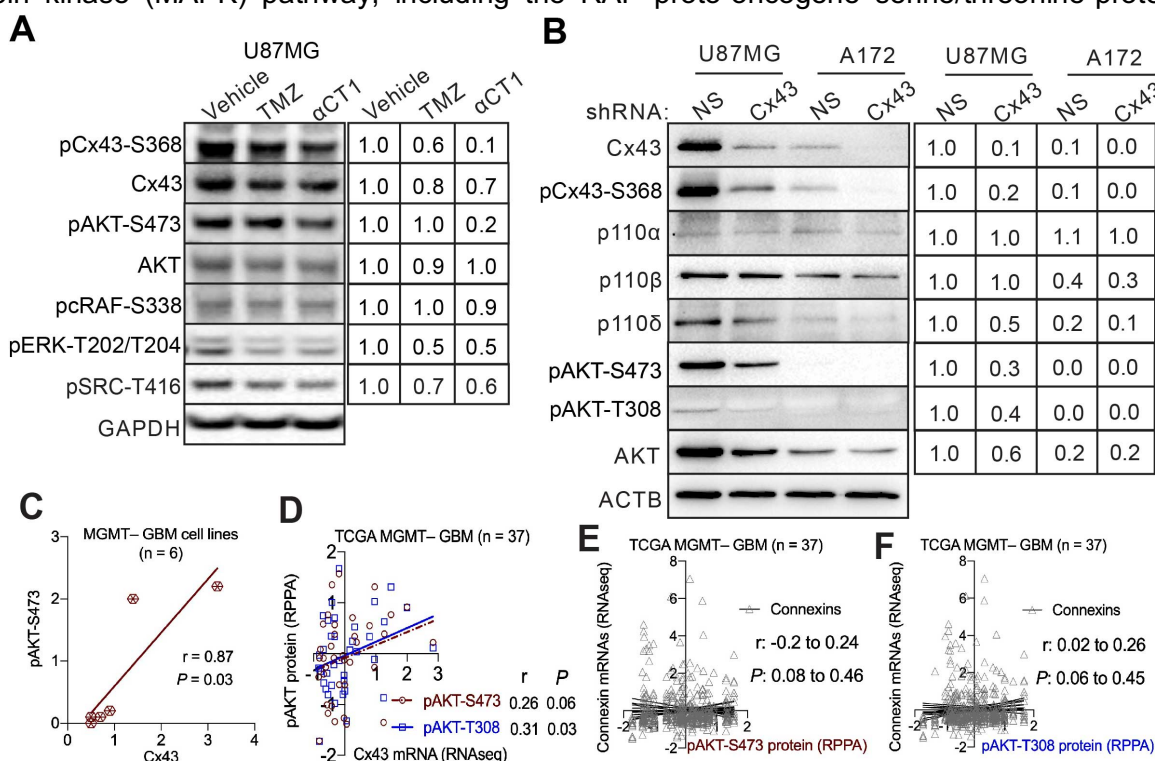

**Fig. 3. Cx43 blockade inactivates PI3K.** (A) Signaling pathways affected by  $\alpha$ CT1. U87MG cells were treated with 100  $\mu$ M  $\alpha$ CT1 or 50  $\mu$ M TMZ for 4 days. pAKT-S473, pcRAF-S338, pERK-T202/T204, and pSRC-T416 were analyzed using immunoblotting. Glyceraldehyde 3-phosphate dehydrogenase (GAPDH) was the loading control. Band intensities were quantified using Image J. Vehicle was set as 1.0 and each treatment was normalized to the vehicle. (B) PI3K signaling upon depletion of Cx43. U87MG and A172 cells were treated with a non-silencing short hairpin RNA (NS shRNA) or a Cx43 shRNA. U87MG cells treated with NS shRNA were set as 1.0.  $\beta$ -actin (ACTB) was the loading control. Pearson coefficient correlation analysis between protein levels of Cx43 and pAKT-S473 in 6 MGMT-deficient GBM cell lines (C), mRNA levels of Cx43 and protein levels of pAKT-S473 or pAKT-T308 in MGMT-deficient patients (D), or mRNA levels of connexins and protein levels of pAKT-S473 (E) and pAKT-T308 (F) in MGMT-deficient GBMs. The Pearson correlation coefficient ( $r$ ) and  $P$  value that determines statistical significance of the coefficient are shown. Cell line data were retrieved from our previous studies (21, 30). RNA sequencing (RNAseq) data and results of reverse phase protein array (RPPA) were retrieved from the TCGA database.

126 (RAF)/extracellular-signal-regulated kinase (ERK) cascade and the SRC proto-oncogene non-receptor  
 127 tyrosine kinase (SRC) pathway.  $\alpha$ CT1 modestly reduced levels of pRAF-S338, pERK-T202/T204, or  
 128 pSRC-T416. Hence,  $\alpha$ CT1 influences the activity of multiple signaling pathways. The Cx43-induced  
 129 activation of PI3K was further verified by the knockdown of Cx43 using a short hairpin RNA (shRNA)  
 130 because the Cx43 shRNA not only drastically decreased levels of Cx43 and pCx43-S368, but also  
 131 remarkably mitigated PI3K activity in U87MG cells but not in Cx43-low/TMZ-sensitive A172 cells (**Fig.**  
 132 **3B**). Through reanalyzing data from our previous work (21, 30), we detected a strong correlation between  
 133 Cx43 and pAKT-S473 in six MGMT-deficient GBM cell lines (**Fig. 3C** and Supplemental Table S2). A  
 134 positive trend was also found between levels of Cx43 mRNA and pAKT-S473 or pAKT-T308 in 37 MGMT-  
 135 deficient GBM patients in the TCGA dataset (**Fig. 3D**). Other connexins, however, failed to show  
 136 statistically significant correlations with either pAKT-S473 (**Fig. 3E**) or pAKT-T308 (**Fig. 3F**).

137 To determine whether PI3K is required for Cx43-induced TMZ resistance, we overexpressed  
 138 PIK3CA-E545K, a PI3K mutant that constitutively activates PI3K, in U87MG cells (**Fig. 4A**). PIK3CA-  
 139 E545K counterbalanced the growth inhibition induced by TMZ or by a combination of TMZ and  $\alpha$ CT1  
 140 (**Fig. 4B**). This counteraction was not seen in U87MG cells expressing an active mutant of ERK (ERK2-  
 141 L73PS151D; **Fig. 4C**) or SRC (SRC-Y527F; **Fig. 4D**). These results suggest that, while Cx43 activates

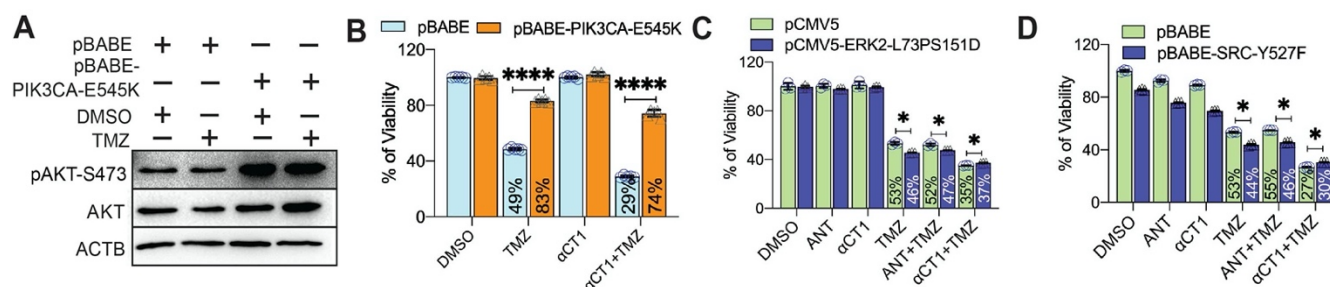

**Fig. 4. Activation of PI3K, but not ERK or SRC, reverse growth inhibition induced by  $\alpha$ CT1/TMZ.**

(A) Expression of PIK3CA-E545K (an active PI3K mutant). U87MG cells were transfected with pBABE or pBABE-PIK3CA-E545K encoding PIK3CA-E545K followed by the treatment of 100  $\mu$ M TMZ. Dimethyl Sulfoxide (DMSO) is the vehicle control. (B) The effect of PIK3CA-E545K on the  $\alpha$ CT1/TMZ-induced growth inhibition. Transfected cells were treated with a combination of 100  $\mu$ M  $\alpha$ CT1 and/or 100  $\mu$ M TMZ for 6 days. Cell viability was measured using the MTS viability assay. Percentages of viability were obtained by normalizing the MTS readings of treatment groups to that of DMSO. (C) The effect of ERK2-L73PS151D on the  $\alpha$ CT1/TMZ-induced growth inhibition. U87MG cells were transfected with pCMV5 or pCMV5-ERK2-L73PS151D (encoding an active ERK2 mutant) followed by the treatment of  $\alpha$ CT1 or antennapedia peptide (ANT; the control peptide for  $\alpha$ CT1) and/or TMZ. (D) The effect of SRC-Y527F on the  $\alpha$ CT1/TMZ-induced growth inhibition. U87MG cells were transfected with pBABE or pBABE-SRC-Y527F (encoding an active SRC mutant) followed by the treatment of  $\alpha$ CT1 or ANT and/or TMZ. Student *t* test was used to determine statistical significance. \*:  $P < 0.05$ ; \*\*\*\*:  $P < 0.0001$ .



142 multiple signaling pathways such as PI3K, ERK, or SRC, only the activation of PI3K is important for Cx43  
 143 to induce TMZ resistance.

144 **Cx43 activates PI3K through selectively binding to the PI3K catalytic subunit  $\beta$**

145 Because the Cx43-CT regulates the activity of Cx43-channels (31), it is possible that small  
 146 molecules such as ATP or glutamate released from Cx43-channels activate PI3K in GBM cells as they  
 147 do in astrocytes (32). To test this possibility, we treated U87MG cells with Gap27, a Cx43 peptide inhibitor  
 148 that targets the second extracellular loop of Cx43 and blocks Cx43-channels (33). Gap27, however, did  
 149 not attenuate PI3K activity (**Fig. 5A**). Moreover, levels of ATP or glutamate in culture media either  
 150 elevated or remained unchanged in  $\alpha$ CT1-treated cells (**Fig. 5B-D**), consistent with the  
 151 dephosphorylation of Cx43 at S368 by  $\alpha$ CT1 (**Fig. 3A**), which enhances the permeability of Cx43  
 152 hemichannels (34). ATP or glutamate levels remained unchanged in cells (**Fig. 5E-F**). Our results  
 153 suggest that Cx43-channels are dispensable for PI3K activation in GBM cells.

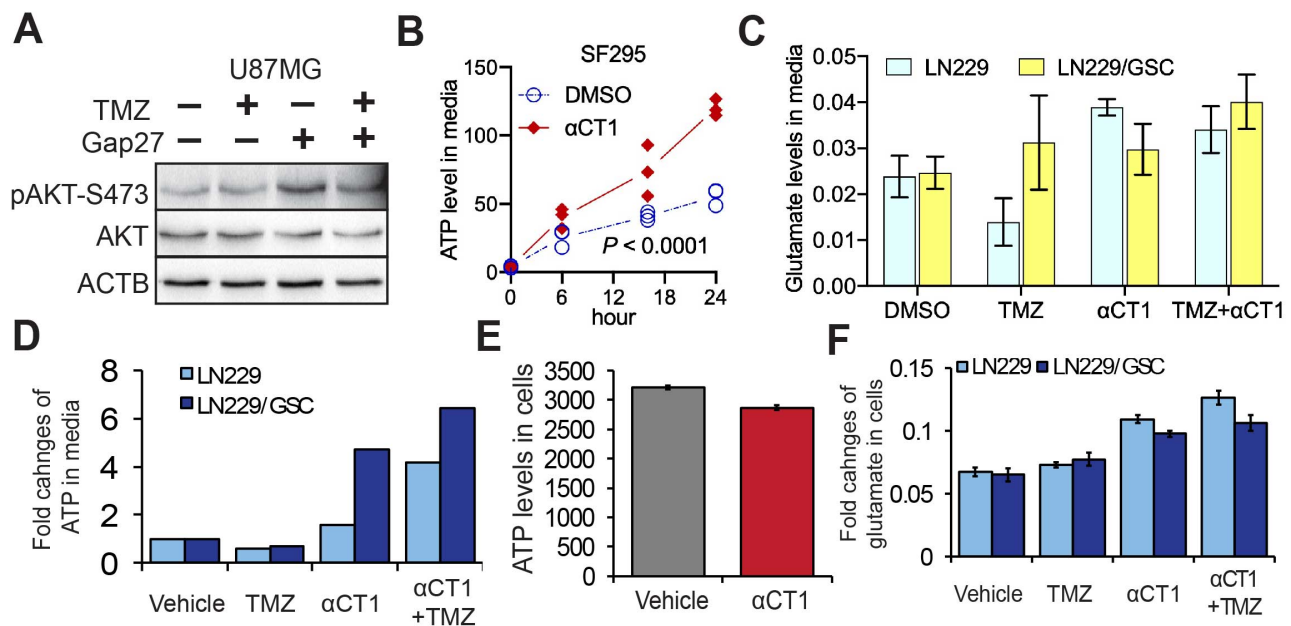

**Fig. 5.  $\alpha$ CT1 does not change Cx43 channel activity in GBM.** (A) The effect of Gap27 on PI3K signaling. U87MG cells were treated with 100  $\mu$ M TMZ or 100  $\mu$ M Gap27. (B) ATP release from Cx43-high/MGMT-deficient/TMZ-resistant SF295 cells. Cells were treated with 100  $\mu$ M  $\alpha$ CT1. Culture media were collected at different time points. ATP was measured using a colorimetric assay. One-way ANOVA was used to determine statistical significance. (C) Glutamate release in Cx43-low/MGMT-deficient/TMZ-sensitive LN229 or Cx43-high/MGMT-deficient/TMZ-resistant LN229/GSC cells. Cells were treated with 100  $\mu$ M TMZ and/or 100  $\mu$ M  $\alpha$ CT1. Glutamate in culture media was determined using a colorimetric assay. (D) ATP release in LN229 and LN229/GSC cells. (E) ATP within SF295 cells. (F) Glutamate within LN229 and LN229/GSC cells. GSC: glioblastoma stem cells.

154 Cx43-CT interacts with certain signaling molecules (28). It is likely that Cx43 binds to PI3K  
 155 catalytic subunits to activate PI3K. The Class I PI3K family consists of four highly homologous catalytic

156 subunits: PI3K catalytic subunits  $\alpha$ ,  $\beta$ ,  $\delta$ , and  $\gamma$  (PIK3CA, PIK3CB, PIK3CD, and PIK3CG) encoding p110 $\alpha$ ,  
 157 p110 $\beta$ , p110 $\delta$ , and p110 $\gamma$ , respectively (35). Our previous work has demonstrated that PI3K catalytic  
 158 subunits play different roles in GBM cell survival, with p110 $\beta$  being the most dominant isoform in GBM  
 159 (30). To determine whether PI3K catalytic subunits also function divergently in Cx43-induced PI3K  
 160 activation, we reanalyzed protein expression data in six MGMT-deficient GBM cell lines (Supplemental  
 161 Table S2). Levels of Cx43 protein showed a positive and statistically significant correlation with those of  
 162 p110 $\beta$ , but not other p110s or the regulatory subunit p85 (**Fig. 6A**). mRNA levels of Cx43 also positively  
 163 corresponded with those of PIK3CB, but not other PI3K subunits, in 89 MGMT-deficient GBM patients in

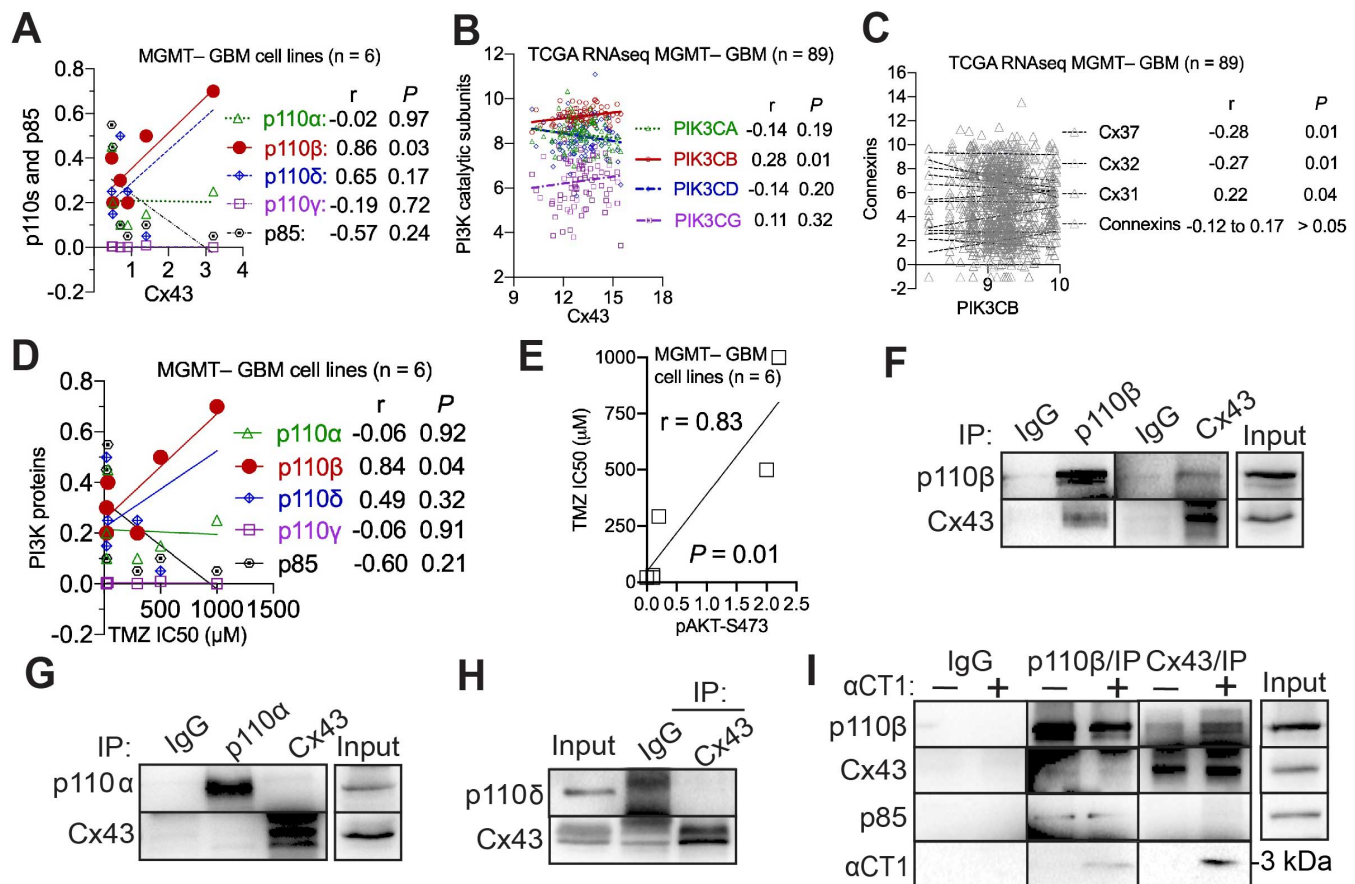

**Fig. 6. Cx43 activates PI3K through selectively binding to the PI3K catalytic subunit  $\beta$ .** Pearson coefficient Correlation between protein levels of Cx43 and PI3K catalytic subunits in 6 MGMT-deficient GBM cell lines (**A**), mRNA levels of Cx43 and PI3K catalytic subunits in MGMT-deficient GBM patients (**B**), mRNA levels of PIK3CB and connexins in MGMT-deficient GBM patients (**C**), protein levels of p110 proteins and IC50s of TMZ in 6 MGMT-deficient GBM cell lines (**D**), or protein levels of pAKT-S473 and IC50s of TMZ in 6 MGMT-deficient GBM cell lines (**E**). Cell line data were retrieved from our previous studies (21, 30). RNAseq data were retrieved from the TCGA database. The Pearson correlation coefficient  $r$  and corresponding  $p$  are shown. Co-immunoprecipitation of Cx43 and p110 $\beta$  (**F**), p110 $\alpha$  (**G**), or p110 $\delta$  (**H**) in U87MG cells. (**I**) Co-immunoprecipitation of Cx43 and p110 $\beta$  in U87MG cell lysates treated with 100  $\mu$ M  $\alpha$ CT1.  $\alpha$ CT1 is about 3 kDa and recognized by the Cx43 antibody. IP: immunoprecipitation. Rabbit IgG was used as the control.

164 the TGCA RNAseq dataset (**Fig. 6B**). In the same dataset, PIK3CB displayed no or negative correlation  
165 with the 21 other connexin family members, except Cx31 (**Fig. 6C**). Such a positive correlation between  
166 Cx43 and PIK3CB was recapitulated in multiple GBM datasets (Supplement Fig. S6) and further verified  
167 by the finding that high levels of pAKT-S473 or p110 $\beta$ , but not other p110s, correlated with low TMZ  
168 sensitivity indicated by the increase of TMZ IC50s (**Fig. 6D-E**). To further probe the molecular details of  
169 Cx43-induced PI3K activation, we monitored protein-protein interactions between Cx43 and p110  
170 proteins. Cx43 was co-precipitated with p110 $\beta$  (**Fig. 6F**), but not with p110 $\alpha$  or p110 $\delta$  (**Fig. 6G-H**),  
171 demonstrating a selective binding of Cx43 to p110 $\beta$ . We did not examine p110 $\gamma$  because p110 $\gamma$  is not  
172 detectable in GBM (30). To determine whether  $\alpha$ CT1 binds to Cx43 and/or p110 $\beta$ , we treated U87MG  
173 cell lysates with  $\alpha$ CT1 and found that  $\alpha$ CT1 was pulled down together with p110 $\beta$  and Cx43 (**Fig. 6I**). In  
174 the presence of  $\alpha$ CT1, more p110 $\beta$  was found in the Cx43 precipitate. This might be because the Cx43  
175 antibody is able to precipitate  $\alpha$ CT1/Cx43/p110 $\beta$  (or  $\alpha$ CT1/p110 $\beta$ ) and Cx43/p110 $\beta$  protein complexes.  
176 Taken together, we have, for the first time, defined a novel non-channel activity of Cx43, through which  
177 p110 $\beta$  is selectively bound and activated in GBM.

#### 178 **A combination of $\alpha$ CT1 and p110 $\beta$ -selective inhibitors overcomes TMZ resistance**

179  $\alpha$ CT1 alone increases the sensitivity of LN229/GSC xenograft tumors to TMZ (21); however, the  
180 short half-life of  $\alpha$ CT1 demands high concentrations and repeated drug delivery, which may limit its  
181 therapeutic potential. Prompted by the above results, we tested the combination of  $\alpha$ CT1 and p110 $\beta$ -  
182 selective inhibitors in cultured cells and in mice. To achieve a synergistic therapeutic effect of multiple  
183 drugs, we optimized the dose of each individual drug in U87MG cells. By varying doses of TMZ or a  
184 p110 $\beta$ -selective inhibitor TGX-221, we found that the double combination of 50  $\mu$ M TMZ and 20  $\mu$ M TGX-  
185 221 did not significantly inhibit the viability of U87MG cells (Supplemental Fig. S7A-B). However, the  
186 addition of  $\alpha$ CT1 greatly increased the cytotoxic effect of the TMZ/TGX-221 double combination  
187 (Supplemental Fig. S7C). We next employed a coefficient of drug interaction (CDI) analysis, a method  
188 that has been used to measure drug synergy (36-39). CDI < 1 indicates a synergistic effect; CDI = 1  
189 means an additive drug effect; CDI > 1 refers to an antagonistic effect. 2.5 to 10  $\mu$ M  $\alpha$ CT1 only yielded  
190 an additive effect together with TMZ/TGX-221, whereas 12.5 to 50  $\mu$ M  $\alpha$ CT1 synergistically blocked cell  
191 growth (Supplemental Fig. S7D).

192 Based on these results, 30  $\mu$ M  $\alpha$ CT1, 20  $\mu$ M TGX-221, and 50  $\mu$ M TMZ was used in a triple  
193 combination named  $\alpha$ CT1/TGX/TMZ combo. The  $\alpha$ CT1/TGX/TMZ combo synergistically reduced the  
194 viability of MGMT-deficient/TMZ-resistant SF295, VTC-103, and VTC-003 cells that express high levels  
195 of Cx43 and p110 $\beta$  (**Fig. 7A** and Supplemental Fig. S8A) (21, 30). Notably, VTC-103, VTC-003, and

196 other VTC lines described hereafter were derived from freshly dissected GBM tumors (21, 30). CDIs of  
 197 the  $\alpha$ CT1/TGX/TMZ combo were significantly lower than those of double combinations (Fig. 7B and

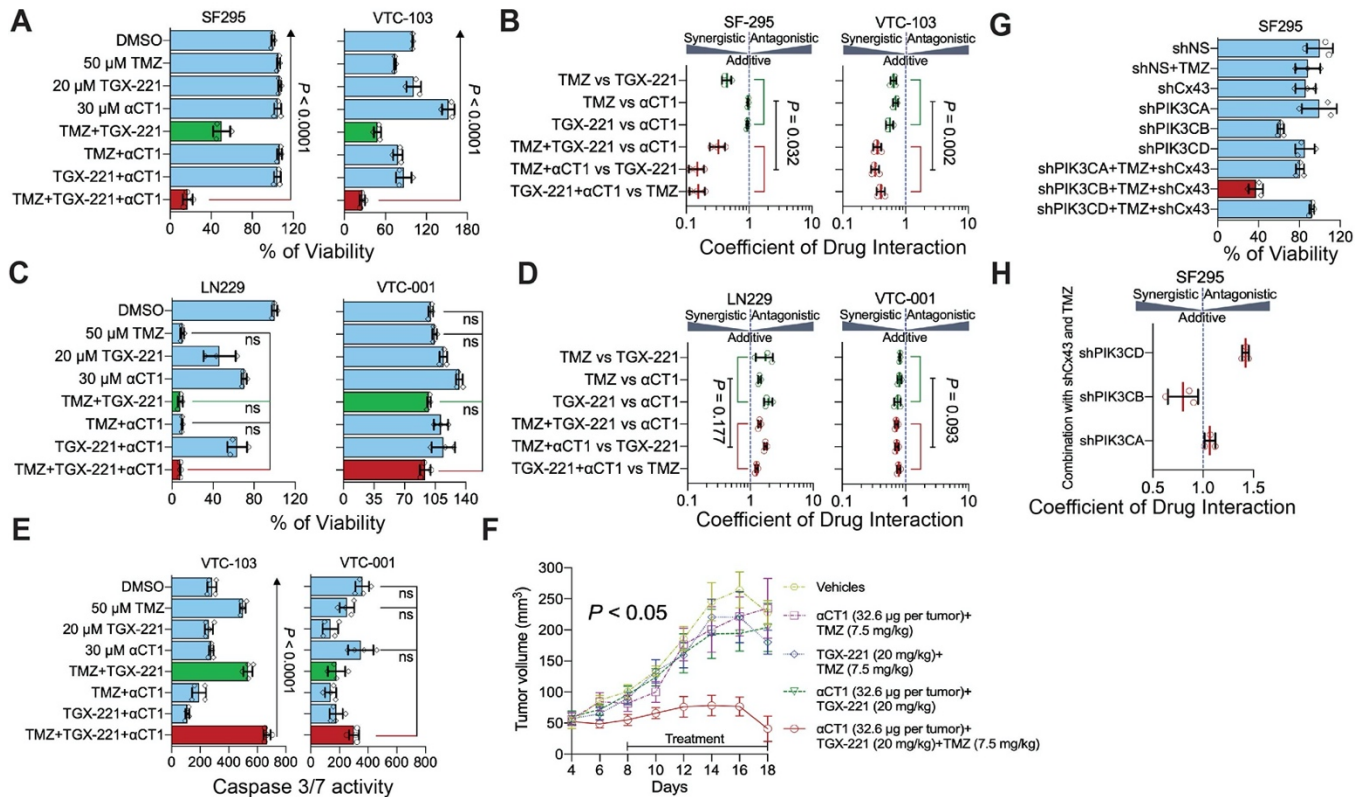

**Fig. 7. A combination of  $\alpha$ CT1 and TGX-221 overcomes TMZ resistance *in vitro* and *in vivo*.** (A) The effect of the  $\alpha$ CT1/TGX-221/TMZ combo in Cx43/p110 $\beta$ -high/MGMT-deficient/TMZ-resistant SF295 and VTC-103 cells. Cells were treated with 50  $\mu$ M TMZ, 20  $\mu$ M TGX-221, and/or 30  $\mu$ M  $\alpha$ CT1 including single agents, double combinations and the  $\alpha$ CT1/TGX-221/TMZ combo. This scheme has been repeated in experiments presented hereafter. Cell viability was determined using the MTS viability assay. Percentages of cell viability were obtained by normalizing the MTS readings of treatment groups to that of DMSO group. (B) Coefficient of drug interaction (CDI) analysis in SF295 and VTC-103 cells. The drug combination is synergistic if CDI is less than 1, additive if CDI equals to 1, or antagonistic if CDI is more than 1. CDIs of triple combinations (red) were compared to double combinations (green) and statistical significance was determined using the student *t* test. (C) The effect of the  $\alpha$ CT1/TGX-221/TMZ in Cx43/p110 $\beta$ -low/MGMT-deficient/TMZ-sensitive LN229 and TMZ-resistant VTC-001 cells. (D) CDI analyses in LN229 and VTC-001 cells. (E) Caspase 3/7 activity in VTC-103 and VTC-001 cells. The activity of cleaved caspase 3/7 (active) was determined using a luminescence assay. Shown are luminescence readings. (F) The effect of  $\alpha$ CT1/TGX-221/TMZ combo on SF295 xenograft tumors. SF295 cells were subcutaneously injected into immuno-deficient mice. 8 days later, mice were treated with TMZ, TGX-221, or  $\alpha$ CT1 through intraperitoneal or intratumoral injection every other day until day 18. Tumor volumes are shown. (G) The effect of shRNA of Cx43 or PI3K catalytic subunits on the TMZ sensitivity of SF295 cells. Cells were transfected with NS shRNA or shRNA of Cx43, PIK3CA, PIK3CB, or PIK3CD followed by the treatment of 50  $\mu$ M TMZ. Cell viability was determined using the MTS viability assay. Percentages of cell viability were obtained by normalizing the MTS readings of treatment groups to that of shNS group. (H) The coefficient of drug interaction (CDI) analyses for A. One-way ANOVA or student *t* test was used to determine statistical significance. \*:  $P < 0.05$ ; ns: not significant.

198 Supplemental Fig. S8B). This synergistic effect was, however, not found in MGMT-deficient/TMZ-  
199 sensitive LN229 and A172 or MGMT-deficient/TMZ-resistant VTC-001, VTC-005, and VTC-004 (**Fig. 7C-**  
200 **D** and Supplemental Fig. S8 and S9) whose levels of Cx43 and p110 $\beta$  are low (21, 30). The  
201  $\alpha$ CT1/TGX/TMZ combo activated apoptosis in VTC-103 cells (**Fig. 7E**), coinciding with the drastic  
202 decrease of cell growth (**Fig. 7A**), whereas apoptosis was not induced in VTC-001 cells (**Fig. 7E**). To  
203 verify our *in vitro* studies *in vivo*, we treated mice bearing SF295 xenograft tumors with 7.5 mg/kg TMZ  
204 and 20 mg/kg TGX-221 through intraperitoneal injection in conjunction with 32.6  $\mu$ g of  $\alpha$ CT1 per tumor  
205 through intratumoral injection. The  $\alpha$ CT1/TGX/TMZ combo (red line) stopped tumor growth (**Fig. 7F**,  $P <$   
206 0.05), whereas double combinations exhibited limited to no inhibition. Based on tumor volumes on the  
207 last day of treatment, the CDI of the triple combo was approximately 0.22, confirming a strong synergy  
208 amongst  $\alpha$ CT1, TGX-221, and TMZ *in vivo*. To verify that the synergistic cytotoxicity is due to the  
209 blockade of Cx43/p110 $\beta$ , we knocked down Cx43 and individual PI3K catalytic subunits using shRNAs.  
210 Depletion of p110 $\beta$ , but not p110 $\alpha$  or p110 $\delta$ , blocked the growth of SF295 cells (**Fig. 7G**) and only the  
211 combination of PIK3CB shRNA, Cx43 shRNA, and TMZ yielded synergistic inhibition of cell viability (**Fig.**  
212 **7H**).

213 To corroborate results from TGX-221, we tested another p110 $\beta$ -selective inhibitor GSK2636771  
214 (abbreviated hereafter as GSK), which has been used in a clinical study (40).  $\alpha$ CT1/GSK/TMZ combo  
215 entailing 25  $\mu$ M GSK, 30  $\mu$ M  $\alpha$ CT1, and 50  $\mu$ M TMZ synergistically blocked the viability of VTC-103 cells  
216 (**Fig. 8A-B**) and U87MG cells (Supplemental Fig. S10), but not the viability of LN229 cells (**Fig. 8C-D**).  
217  $\alpha$ CT1/GSK/TMZ has achieved the same synergistic inhibition of GBM cell viability as the  $\alpha$ CT1/TGX/TMZ  
218 combo. To determine the toxicity of these combinations on normal cells, we treated astrocytes with  
219  $\alpha$ CT1/TGX/TMZ or  $\alpha$ CT1/GSK/TMZ. These drug combinations did not increase TMZ alone-induced  
220 growth inhibition in astrocytes (**Fig. 8E**), suggesting that addition of  $\alpha$ CT1 and p110 $\beta$ -selective inhibitors  
221 does not exacerbate non-selective toxicity of TMZ to the normal brain. Collectively, our results  
222 demonstrate that simultaneously targeting Cx43 and p110 $\beta$  diminishes TMZ resistance.

## 223 Discussion

224 In this report, we have identified the molecular details underlying Cx43-induced MGMT-  
225 independent TMZ resistance. As illustrated in a model proposed in **Fig. 8F**, Cx43-CT binds to p110 $\beta$ /p85  
226 signaling complex upon receiving signals from extracellular cues (i.e. growth factors). This selective  
227 binding brings the p110 $\beta$ /p85 signaling complex to the membrane and subsequently activates AKT.  
228 Activated PI3K/AKT signaling renders GBM cells resistant to TMZ, which is independent of MGMT. This  
229 model not only explains how a gap junction protein regulates chemoresistance through its non-channel

230 activity, but also provides a strong rationale for developing combinational therapies to overcome TMZ  
 231 resistance. Indeed, our results shown in **Figs. 7-8** indicates that  $\alpha$ CT1, a Cx43-CT mimetic peptide that  
 232 likely blocks interactions between Cx43-CT and p110 $\beta$ , works synergistically together with p110 $\beta$  kinase  
 233 inhibitors (directly blocking kinase activity) in overcoming TMZ resistance.

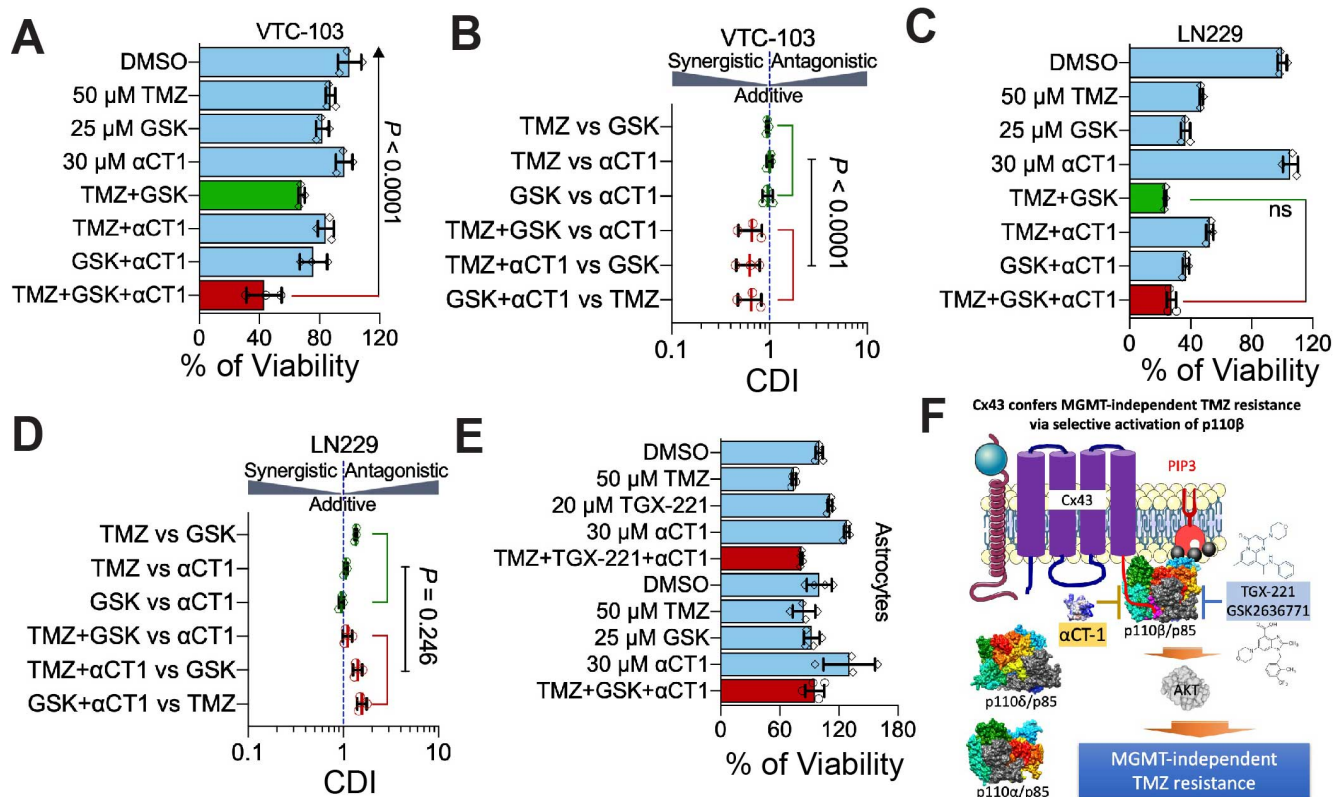

**Fig. 8. A combination of  $\alpha$ CT1 and GSK2636771 overcomes TMZ resistance.** (A) The effect of the  $\alpha$ CT1/GSK/TMZ combo in VTC-103 cells. Cells were treated with 50  $\mu$ M TMZ, 25  $\mu$ M GSK2636771, and/or 30  $\mu$ M  $\alpha$ CT1 including single agents, double combinations and the  $\alpha$ CT1/GSK/TMZ combo. (B) CDI analyses in VTC-103 cells. (C) The effect of the  $\alpha$ CT1/GSK/TMZ combo in LN229 cells. (D) CDI analyses in LN229 cells. (E) The effect of the  $\alpha$ CT1/TGX-221/TMZ or  $\alpha$ CT1/GSK/TMZ combo in astrocytes. (F) A model illustrating the mechanism of Cx43-induced MGMT-independent TMZ resistance and the model of action of the triple combination. One-way ANOVA or student *t* test was used to determine statistical significance. \*:  $P < 0.05$ ; ns: not significant.

234 Prior studies report that approximately 20-60% of GBM patients express Cx43 mRNA and protein  
 235 at high levels (15). In light of the fact that 45% of GBM patients express no MGMT (6, 7), there should  
 236 be 10% (20% x 50%) to 30% (60% x 50%) of patients that are MGMT-deficient and express high levels  
 237 of Cx43. Congruent with this expectation, we have found that 16.7% of MGMT-deficient GBM patients  
 238 express high levels of Cx43 (21). That being said, around 20% of Cx43-high GBM patients may be  
 239 refractory to TMZ treatment in the clinic. Therefore, the combinational treatment developed herein will  
 240 benefit MGMT-deficient/TMZ-resistant patients expressing high levels of Cx43, thereby having an  
 241 important impact on future therapeutic intervention. Previous work has also revealed that, with the

242 exception of Cx43, overexpression or inhibition of Cx30, Cx32, Cx26, or Cx46 also blocks the growth of  
243 rat or human glioma cells (41-48). However, contradictory to these results, other studies show that Cx30  
244 and Cx32 have no effect on glioma growth (44, 49, 50). In line with the fact that Cx43 levels are much  
245 higher than other connexins in GBM and the finding that Cx43 controls chemoresistance, this connexin  
246 is therefore the prime therapeutic target for GBM.

247 Cx43 has long been considered as a tumor suppressor for glioma because overexpression of  
248 Cx43 leads to remarkable growth inhibition (51) and levels of Cx43 mRNA and protein inversely correlate  
249 with the aggressiveness of glioma (52). However, drawbacks in these studies have made the tumor  
250 suppressive activity of Cx43 questionable. For example, while ectopically expressing Cx43 does inhibit  
251 tumor cell growth, it is unclear whether the loss of endogenous Cx43 in normal glia cells promotes  
252 gliomagenesis as other tumor suppressors do, namely p53 and NF-1. Nonetheless, it is possible that gap  
253 junction intercellular communication controlled by Cx43 is GBM suppressive because loss of this  
254 communication promotes oncogene-induced transformation (53). In contrast to these studies, we have  
255 established a tumor-promoting role of Cx43 in GBM. Cx43, whose mRNA levels are the highest among  
256 all connexins, not only correlates with GBM prognosis and chemoresistance, but also activates PI3K  
257 independent of Cx43-channels to induce TMZ resistance. Therefore, it is likely that Cx43 has multifaceted  
258 roles in GBM: Cx43-channels inhibit GBM formation, whereas the Cx43 CT confers chemoresistance  
259 through activating PI3K, which is independent of Cx43 channel function, during GBM progression.

## 260 **Methods**

### 261 **Reagents**

262 TMZ (AbMole BioScience), GSK2636771 (AdooQ Bioscience), TGX-221 (AdooQ Bioscience)  
263 were reconstituted in dimethyl sulfoxide (DMSO) at a concentration of 50-80 mM.  $\alpha$ CT1 and Gap27 were  
264 purchased from LifeTein, LLC. Lyophilized peptide was reconstituted in 1x PBS (137 mM NaCl, 2.7 mM  
265 KCl, 10 mM Na<sub>2</sub>HPO<sub>4</sub>, and 1.8 mM KH<sub>2</sub>PO<sub>4</sub>) at a concentration of 5 or 10 mM. Puromycin was purchased  
266 from Millipore-Sigma and dissolved in sterile water at a concentration of 5 mg/ml. All chemicals were  
267 aliquoted (to avoid repeated freeze/thaw cycles that decrease drug activity) and stored at -80 °C.

### 268 **Cell culture**

269 GBM cell lines, primary GBM cells, glioblastoma stem cells (GSCs), and human astrocytes were  
270 cultured as previously described (54). In brief, GBM cell lines A172, SF-295, LN229, and U87MG were  
271 maintained in Dulbecco's Modified Eagle Medium (DMEM, Life Technologies) supplemented with 10%  
272 EquaFETAL® bovine serum (Atlas Biologicals, Inc.) and 100 µg/ml streptomycin and 100 IU/ml penicillin  
273 (Gibco). Primary cells VTC-001, VTC-003, VTC-04, VTC-005, and VTC-103 were cultured in DMEM

274 supplemented with 15% fetal bovine serum (Peak Serum, Inc.) and penicillin/streptomycin. Normal  
275 human astrocytes were cultured in MCDB-131 Medium (Sigma) containing 3% fetal bovine serum (Peak  
276 Serum, Inc.), 10 X G-5 Supplement (Gibco), and penicillin/streptomycin. Cell lines have been  
277 authenticated by the ATCC authentication service utilizing Short Tandem Repeat (STR) profiling. Primary  
278 GBM cells were kept at low passages (no more than 10).

### 279 **Analysis of online databases**

280 GBM gene expression datasets (cDNA microarrays or RNA sequencing) or the data of reverse  
281 phase protein assay (RPPA) associated with corresponding clinical information and protein  
282 immunostaining data of human tissues are downloaded from the following websites: (1) The Cancer Gene  
283 Atlas (TCGA) datasets: <https://www.cbioportal.org> and <https://gliovis.shinyapps.io/GlioVis/>; (2)  
284 Gravendeel, Rembrandt, Lee Y, and Murat GBM: <https://gliovis.shinyapps.io/GlioVis/>; (3) The China  
285 Glioma Gene Atlas (CGGA) datasets: <https://gliovis.shinyapps.io/GlioVis/>; (4) GBM cell lines from the  
286 Cancer Dependency Map (DepMap): <https://depmap.org/portal/>; (5) The Human Protein Atlas (THPA):  
287 <https://www.proteinatlas.org>. To analyze gene expression data, arbitrary readings from cDNA microarray  
288 or RNAseq were used. mRNA levels of GJ genes were averaged and plotted using the Prism 8 software.  
289 For protein immunostaining data, histological images were downloaded and presented. Staining scales  
290 of each sample were recorded. Percentage of cases with high levels or not high levels of GJ proteins  
291 were plotted using the Prism 8 software.

292 For survival analysis, patient clinical information was matched to each individual gene such as  
293 GJA1. Different populations of GBM patients were sorted based on their clinical information. The Kaplan  
294 Meier survival analysis or the Cox hazard proportional model were used to determine the relationship  
295 between gene expression levels and patient survival. The JMP Pro 15 software was used to perform  
296 these analyses. For Kaplan Meier survival analysis, log-rank *P* values are shown to indicate statistical  
297 significance of patient survival between high and low levels of a given gene. For Cox hazard proportional  
298 model, hazard ratios that indicate the risk of death in patients with high levels of a given gene are shown  
299 to present a comparison among different GJ genes.

300 To determine the expression correlation between different genes or proteins, Pearson correlation  
301 coefficient was calculated using the Prism 8 software. The Pearson correlation coefficient determines  
302 whether expression levels of two genes are correlated with each other (positively or negatively) and  
303 whether this correlation is statistically significant or not.

### 304 **MTS cell viability assay**



305 Cell viability was determined by the MTS cell viability assay (Promega) as described previously  
306 (21, 30, 55-57). In brief, 250 to 1,000 cells were plated in the wells of a 96-well plate based upon the cell  
307 growth rate. Because the drug treatment usually takes 6-7 days, fast-growing cells could be over-grown  
308 if plated at a high cell density. For  $\alpha$ CT1 treatment experiments, we intended to plate cells at a low density  
309 to minimize the formation of gap junctions and thus more Cx43-hemichannels will be present. Because  
310 the half-life of  $\alpha$ CT1 is about 48 hours, cells were replenished with fresh  $\alpha$ CT1 every other day, without  
311 replenishing other drugs. Cells were treated with vehicle (DMSO) and chemical inhibitors at the indicated  
312 doses. After 6 days MTS reagent was added to the cells to a final dilution of 10% and incubated at 37°C  
313 for a 4-hour period. At each hour timepoint the absorbance at 490 nm was measured using a FilterMax  
314 F3 microplate reader (Molecular Devices, LLC) according to the manufacturer's instructions. Percent cell  
315 viability was obtained by dividing the absorbance of treatment groups to those of untreated and respective  
316 vehicle control groups.

### 317 **Caspase 3/7 activity assay**

318 Apoptosis was measured using the Caspase-Glo<sup>®</sup> 3/7 Assay (Promega) based on the  
319 manufacturer's instructions and our previous work (21, 30, 55, 56). In brief, VTC-001 and VTC-103 cells  
320 were plated at 1,000 cells/well in 96-well plates and treated with drugs as described for 6 days. After 6  
321 days, 100  $\mu$ L of Caspase-Glo<sup>®</sup> reagent was added to each well and incubated at room temp (RT). The  
322 luminescence was measured using a FilterMax F3 microplate reader (Molecular Devices, LLC) according  
323 to the manufacturer's instructions. The fold changes of caspase-3/7 activity was defined as the ratio of  
324 caspase-3/7 luminescence in the treated cells to that in control cells.

### 325 **Immunoblotting**

326 Immunoblotting was performed as described previously (58, 59). In brief, cells were lysed and  
327 total protein was quantified using the Bradford Assay (Bio-Rad Laboratories, Inc.) An equal amount of  
328 total protein (25-50  $\mu$ g) of cell lysate was loaded onto a 15% SDS-PAGE gel and separated proteins were  
329 transferred onto a PVDF membrane. The resulting protein blot was incubated with antibodies purchased  
330 from Cell Signaling Technology (CST), Millipore-Sigma (MS), and SantaCruz Biotechnology (SC).  
331 Antibodies were diluted as follows: anti-phospho-Cx43-S368(CST-3511,1:1,000), anti-Cx43(CST-3512,  
332 1:1,000), anti-phospho-AKT-S473(CST-4051,1:1,000), anti-phospho-AKT-T308(CST-4056,1:1,000),  
333 anti-AKT(CST-4685,1:1,000), anti-phospho-cRAF-S338(CST-9247,1:1,000), anti-phospho-ERK-  
334 T202/T204(CST-4377,1:1,000), anti-phospho-SRC-T4160(CST-2101,1:1,000), anti-p110 $\alpha$ (CST-  
335 4249,1:1,000), anti-p110 $\beta$ (CST-3011,1:1,000), anti-p110 $\delta$ (CST-34050,1:1,000), anti-p85(CST-  
336 4292,1:1,000), anti- $\beta$ -actin(MS-A3854,1:50,000), and anti-GAPDH(SC-25778,1:1,000). Protein bands  
337 were visualized using a ChemiDoc MP System (Bio-Rad Laboratories, Inc.) and further quantified using

338 Image J software. The relative level of protein is defined as the ratio of band intensity of target protein to  
339 that of  $\beta$ -actin or GAPDH.

### 340 **Co-immunoprecipitation**

341 Co-immunoprecipitation was performed as previously described (59). U87MG cells were cultured  
342 under normal cell culturing conditions and collected at 80% confluency. Cell pellets of approximately 250  
343  $\mu$ L volume were flash frozen. Pellets were then lysed in lysis buffer containing 20 mM HEPES pH 6.8,  
344 140 mM NaCl, 2.5 mM  $MgCl_2$ , 2.5 mM  $CaCl_2$ , 1% NP40, 0.5% sodium deoxycholate, protease inhibitor  
345 (Millipore-Sigma, MS), and phosphatase inhibitors (MS). Total protein lysates were divided equally for  
346 each IP with input and IgG controls. Samples were incubated with primary antibodies O/N at 4°C on a  
347 rotator. Antibodies were diluted as follows: anti-Cx43(MS-C6219,1:50), anti-p110 $\alpha$ (CST-4249,1:25), anti-  
348 p110 $\beta$ (CST-3011,1:25), anti-p110 $\delta$ (CST-34050,1:25). All antibodies were from Rabbit, thus Rabbit IgG  
349 (SC-2027,1:400) was used as a control. Samples were then incubated at RT for 1 hour with Protein G  
350 Dynabeads™ (Thermo-Fisher) on a rotator. Beads were then precipitated using a magnet and the  
351 supernatant removed. Protein-bead complexes were washed 3X with lysis buffer and incubated at RT on  
352 a rotator for 10 minutes and pulled down on the magnet each time. After the final wash and supernatant  
353 removal, the beads were mixed with 2X SDS loading buffer and 1M DTT and boiled at 95°C for 10 minutes  
354 and then vortexed. After boiling, samples were placed on the magnet to remove the beads and the  
355 precipitated proteins were ran on a 15% SDS-PAGE gel at equal volume across samples including the  
356 IgG and input controls.

357

### 358 **Gene knockdown**

359 Knockdown of Cx43 or PI3K genes was described previously (30). Short hairpin (sh) RNA of Cx43  
360 (TRCN0000059773), previously verified was purchased from Millipore-Sigma. shRNAs previously  
361 verified for PI3K genes were purchased from Thermo-Fisher Scientific (PIK3CA: RHS4844-101656239;  
362 PIK3CB:RHS4884-10165656350; PIK3CD:RHS4884-101655755).  $1 \times 10^6$  HEK-293T cells were  
363 transfected with 2  $\mu$ g of plasmid DNA containing each shRNA along with packaging plasmids pMD2.g  
364 and psPax2 using Effectene® Transfection Reagent (QIAGEN) to yield 5 mL of supernatant containing  
365 lentivirus.  $1 \times 10^5$  cells were then seeded and transduced with lentiviruses of non-silencing (NS) shRNA,  
366 single shRNAs of Cx43, PIK3CA, PIK3CB, or PIK3CD, or combinations of Cx43 shRNA and one PI3K  
367 shRNA. Cells were selected with 0.5  $\mu$ g/mL puromycin for 72 hours, with media changes each day. Cells  
368 were then ready for drug treatment assays.

### 369 **Gene overexpression**

370 pBABE-PIK3CA-E545K, pCMV5-ERK2-L73PS151D, and pBABE-SRC-Y527F were purchased  
371 from Addgene. Transfection and expression of these plasmids were described previously (56).

### 372 **ATP/glutamate release**

373 ATP release was measured using the Kinase-Glo<sup>®</sup> Luminescent Kinase Assay (Promega) as per  
374 the manufacturer's instructions. Glutamate release was measured using the Amplex<sup>™</sup> Red Glutamic  
375 Acid/Glutamate Oxidase Assay Kit (ThermoFisher) according to the manufacturer's instruction. In brief,  
376 SF-295 cells were plated at  $4 \times 10^4$  cells/mL in a 24-well plate and allowed to attach. Cells were then  
377 treated with vehicle (DMSO) and  $\alpha$ CT1 (100  $\mu$ M) over a 24-hour period with 100  $\mu$ L of supernatant  
378 collected at 0, 6, 12, 18, and 24-hour time points in triplicate. 25  $\mu$ L of Kinase-Glo<sup>®</sup> reagent was mixed  
379 with the samples and incubated for 10 minutes at room temperature (RT). Luminescence was read on a  
380 FilterMax F3 microplate reader (Molecular Devices, LLC) according to the manufacturer's instructions.  
381 Glutamate release was measured using the Amplex<sup>™</sup> Red Glutamic Acid/Glutamate Oxidase Assay Kit  
382 (ThermoFisher). In brief, LN229 and LN229/GSC cells were plated at  $1 \times 10^4$  cells/mL in a 24-well plate  
383 and allowed to attach. Cells were then treated with vehicle (DMSO), TMZ (50  $\mu$ M) once, and  $\alpha$ CT1 (100  
384  $\mu$ M) every 24 hours for a total of 2 doses in triplicate. After 48 hours of treatment, 50  $\mu$ L of supernatant  
385 was collected and mixed with 50  $\mu$ L of Amplex<sup>®</sup> Red reagent and incubated for 30 minutes at RT. The  
386 sample fluorescence was read on a FilterMax F3 microplate reader with excitation of 560 nm and  
387 emission at 590 nm. The fold change of the Kinase-Glo<sup>®</sup> luminescence or the Amplex<sup>®</sup> Red fluorescence  
388 was defined as the ratio of the relative Kinase-Glo<sup>®</sup> luminescence or the Amplex<sup>®</sup> Red fluorescence in  
389 the treated cells to that of the control cells.

### 390 **CDI calculations**

391 CDI was calculated using the formula: Survival rate of the combination / (Survival rate of treatment  
392 1 x Survival rate of treatment 2), based on previous reports (36-39).

### 393 **Mouse experiments**

394 Mouse experiments were performed based on the methods described previously (30, 56, 60),  
395 with modifications. All animal studies were approved by the Institutional Animal Care and Use Committee  
396 of Virginia Tech.  $2 \times 10^6$  SF-295 cells were mixed with Matrigel<sup>®</sup> Matrix (Corning) and subcutaneously  
397 injected into the flanks of 8-week-old SCID/beige mice (Taconic Biosciences). 8 days post injection, mice  
398 were treated with drugs as indicated in the figure. Drugs were administered every other day via  
399 intraperitoneal injection (TMZ and TGX-221) or through intratumoral injection ( $\alpha$ CT1). Tumors were  
400 measured daily using a caliper. On day 18, mice were euthanized and tumors were harvested. Tumor  
401 volumes ( $\text{mm}^3$ ) were calculated using the formula:  $(\text{length} \times \text{width}^2)/2$ .

402 **Statistical analyses**

403 One-way ANOVA, Fisher's exact test, and student *t* test were used to determine statistical  
404 significance.

405 **Disclosure of Potential Conflicts of Interest**

406 G.G.G. is CEO, President and co-founder of FirstString Research Inc, which licensed  $\alpha$ CT1  
407 peptide. C.L.G is Senior Director of Research and Development at FirstString Research Inc. R.G.G is a  
408 non-remunerated member of the Scientific Advisory Board of FirstString Research, as well as a co-  
409 founder of the company. G.G.G, R.G.G, J.J, and C.L.G. have ownership interests in FirstString Research  
410 Inc. The remaining authors have no disclosures to report.

411 **Authors' Contributions**

412 Conception and design: Z.S., K.J.P., and R.G.G.

413 Development of methodology: K.J.P., F.S., S.G. S.L., J.J., R.V., and Z.S.

414 Acquisition of data (performed experiments, provided reagents, etc.): K.J.P., F.S., K.L.S., S.G., M.L., P.K.,  
415 S.L., G.L, M.M., J.J., R.V., and D.F.K.

416 Analysis and interpretation of data (e.g., statistical analysis, computational analysis): K.J.P., K.L.S., R.V.,  
417 and Z.S.

418 Assistance in data interpretation: C.L.G. and G.G.G.

419 Writing, review, and/or revision of the manuscript: Z.S., R.G.G., and K.J.P.

420 **Acknowledgements**

421 This study is supported by National Institutes of Health (NIH) R21 grants R21CA216768 and  
422 R21CA245631 to Z.S., NIH R01 grants HL56728 and HL141855 to R.G.G., St Baldrick's Foundation  
423 Summer Medical Student Fellowships to F.S. and P.K., and Translational Neurobiology Summer  
424 Undergraduate Research Fellowships from the Fralin Biomedical Research Institute to M.M and G.L. The  
425 results shown in Figure 1 are in part based upon data generated by the TCGA Research Network:  
426 <https://www.cancer.gov/tcga>.

427 **Reference**

428 1. Tisdale, M. J. (1987) Antitumor imidazotetrazines--XV. Role of guanine O6 alkylation in the  
429 mechanism of cytotoxicity of imidazotetrazinones. *Biochem Pharmacol* **36**, 457-462

- 430 2. Portnow, J., Badie, B., Chen, M., Liu, A., Blanchard, S., and Synold, T. W. (2009) The  
431 neuropharmacokinetics of temozolomide in patients with resectable brain tumors: potential  
432 implications for the current approach to chemoradiation. *Clin Cancer Res* **15**, 7092-7098
- 433 3. Ostrom, Q. T., Gittleman, H., Truitt, G., Boscia, A., Kruchko, C., and Barnholtz-Sloan, J. S. (2018)  
434 CBTRUS Statistical Report: Primary Brain and Other Central Nervous System Tumors Diagnosed  
435 in the United States in 2011-2015. *Neuro Oncol* **20**, iv1-iv86
- 436 4. Siegel, R. L., Miller, K. D., and Jemal, A. (2019) Cancer statistics, 2019. *CA Cancer J Clin* **69**, 7-  
437 34
- 438 5. Weller, M., Cloughesy, T., Perry, J. R., and Wick, W. (2013) Standards of care for treatment of  
439 recurrent glioblastoma--are we there yet? *Neuro Oncol* **15**, 4-27
- 440 6. Stupp, R., Mason, W. P., van den Bent, M. J., Weller, M., Fisher, B., Taphoorn, M. J., Belanger,  
441 K., Brandes, A. A., Marosi, C., Bogdahn, U., Curschmann, J., Janzer, R. C., Ludwin, S. K., Gorlia,  
442 T., Allgeier, A., Lacombe, D., Cairncross, J. G., Eisenhauer, E., and Mirimanoff, R. O. (2005)  
443 Radiotherapy plus concomitant and adjuvant temozolomide for glioblastoma. *The New England*  
444 *journal of medicine* **352**, 987-996
- 445 7. Hegi, M. E., Diserens, A. C., Gorlia, T., Hamou, M. F., de Tribolet, N., Weller, M., Kros, J. M.,  
446 Hainfellner, J. A., Mason, W., Mariani, L., Bromberg, J. E., Hau, P., Mirimanoff, R. O., Cairncross,  
447 J. G., Janzer, R. C., and Stupp, R. (2005) MGMT gene silencing and benefit from temozolomide  
448 in glioblastoma. *N Engl J Med* **352**, 997-1003
- 449 8. Quinn, J. A., Jiang, S. X., Reardon, D. A., Desjardins, A., Vredenburgh, J. J., Rich, J. N.,  
450 Gururangan, S., Friedman, A. H., Bigner, D. D., Sampson, J. H., McLendon, R. E., Herndon, J.  
451 E., 2nd, Walker, A., and Friedman, H. S. (2009) Phase II trial of temozolomide plus o6-  
452 benzylguanine in adults with recurrent, temozolomide-resistant malignant glioma. *Journal of*  
453 *clinical oncology : official journal of the American Society of Clinical Oncology* **27**, 1262-1267
- 454 9. Bocangel, D. B., Finkelstein, S., Schold, S. C., Bhakat, K. K., Mitra, S., and Kokkinakis, D. M.  
455 (2002) Multifaceted resistance of gliomas to temozolomide. *Clinical cancer research : an official*  
456 *journal of the American Association for Cancer Research* **8**, 2725-2734
- 457 10. Happold, C., Roth, P., Wick, W., Schmidt, N., Florea, A. M., Silginer, M., Reifenberger, G., and  
458 Weller, M. (2012) Distinct molecular mechanisms of acquired resistance to temozolomide in  
459 glioblastoma cells. *Journal of neurochemistry*
- 460 11. Cahill, D. P., Levine, K. K., Betensky, R. A., Codd, P. J., Romany, C. A., Reavie, L. B., Batchelor,  
461 T. T., Futreal, P. A., Stratton, M. R., Curry, W. T., Iafrate, A. J., and Louis, D. N. (2007) Loss of  
462 the mismatch repair protein MSH6 in human glioblastomas is associated with tumor progression

- 463 during temozolomide treatment. *Clinical cancer research : an official journal of the American*  
464 *Association for Cancer Research* **13**, 2038-2045
- 465 12. Messaoudi, K., Clavreul, A., and Lagarce, F. (2015) Toward an effective strategy in glioblastoma  
466 treatment. Part I: resistance mechanisms and strategies to overcome resistance of glioblastoma  
467 to temozolomide. *Drug Discov Today*
- 468 13. Palatinus, J. A., Rhett, J. M., and Gourdie, R. G. (2012) The connexin43 carboxyl terminus and  
469 cardiac gap junction organization. *Biochim Biophys Acta* **1818**, 1831-1843
- 470 14. Chen, W., Wang, D., Du, X., He, Y., Chen, S., Shao, Q., Ma, C., Huang, B., Chen, A., Zhao, P.,  
471 Qu, X., and Li, X. (2015) Glioma cells escaped from cytotoxicity of temozolomide and vincristine  
472 by communicating with human astrocytes. *Medical oncology* **32**, 43
- 473 15. Gielen, P. R., Aftab, Q., Ma, N., Chen, V. C., Hong, X., Lozinsky, S., Naus, C. C., and Sin, W. C.  
474 (2013) Connexin43 confers Temozolomide resistance in human glioma cells by modulating the  
475 mitochondrial apoptosis pathway. *Neuropharmacology* **75**, 539-548
- 476 16. Munoz, J. L., Rodriguez-Cruz, V., Greco, S. J., Ramkissoon, S. H., Ligon, K. L., and Rameshwar,  
477 P. (2014) Temozolomide resistance in glioblastoma cells occurs partly through epidermal growth  
478 factor receptor-mediated induction of connexin 43. *Cell Death Dis* **5**, e1145
- 479 17. Lai, S. W., Huang, B. R., Liu, Y. S., Lin, H. Y., Chen, C. C., Tsai, C. F., Lu, D. Y., and Lin, C.  
480 (2018) Differential Characterization of Temozolomide-Resistant Human Glioma Cells. *Int J Mol*  
481 *Sci* **19**
- 482 18. Yusubalieva, G. M., Baklaushev, V. P., Gurina, O. I., Zorkina, Y. A., Gubskii, I. L., Kobayakov, G.  
483 L., Golanov, A. V., Goryainov, S. A., Gorlachev, G. E., Konovalov, A. N., Potapov, A. A., and  
484 Chekhonin, V. P. (2014) Treatment of poorly differentiated glioma using a combination of  
485 monoclonal antibodies to extracellular connexin-43 fragment, temozolomide, and radiotherapy.  
486 *Bull Exp Biol Med* **157**, 510-515
- 487 19. Zhang, X. H., Qian, Y., Li, Z., Zhang, N. N., and Xie, Y. J. (2016) Let-7g-5p inhibits epithelial-  
488 mesenchymal transition consistent with reduction of glioma stem cell phenotypes by targeting  
489 VSIG4 in glioblastoma. *Oncol Rep* **36**, 2967-2975
- 490 20. Wang, L., Peng, Y., Peng, J., Shao, M., Ma, L., Zhu, Z., Zhong, G., Xia, Z., and Huang, H. (2018)  
491 Tramadol attenuates the sensitivity of glioblastoma to temozolomide through the suppression of  
492 Cx43mediated gap junction intercellular communication. *Int J Oncol* **52**, 295-304
- 493 21. Murphy, S. F., Varghese, R. T., Lamouille, S., Guo, S., Pridham, K. J., Kanabur, P., Osimani, A.  
494 M., Sharma, S., Jourdan, J., Rodgers, C. M., Simonds, G. R., Gourdie, R. G., and Sheng, Z. (2016)  
495 Connexin 43 Inhibition Sensitizes Chemoresistant Glioblastoma Cells to Temozolomide. *Cancer*  
496 *Res* **76**, 139-149

- 497 22. Hunter, A. W., Barker, R. J., Zhu, C., and Gourdie, R. G. (2005) Zonula occludens-1 alters  
498 connexin43 gap junction size and organization by influencing channel accretion. *Molecular*  
499 *biology of the cell* **16**, 5686-5698
- 500 23. Xingyi, J., Guonan, C., Xin, Z., and Naijie, L. (2019) AbCD133 Modified alphaCT1 Loaded Target  
501 Magnetic Mesoporous Silica Nano-Drugcarriers Can Sensitizes Glioma Cancer Stem Cells to  
502 TMZ and Have Therapeutic Potential on TMZ Resistant Glioblastoma. *J Biomed Nanotechnol* **15**,  
503 1468-1481
- 504 24. Bowman, R. L., Wang, Q., Carro, A., Verhaak, R. G., and Squatrito, M. (2017) GlioVis data portal  
505 for visualization and analysis of brain tumor expression datasets. *Neuro Oncol* **19**, 139-141
- 506 25. Ghandi, M., Huang, F. W., Jane-Valbuena, J., Kryukov, G. V., Lo, C. C., McDonald, E. R., 3rd,  
507 Barretina, J., Gelfand, E. T., Bielski, C. M., Li, H., Hu, K., Andreev-Drakhlin, A. Y., Kim, J., Hess,  
508 J. M., Haas, B. J., Aguet, F., Weir, B. A., Rothberg, M. V., Paoella, B. R., Lawrence, M. S., Akbani,  
509 R., Lu, Y., Tiv, H. L., Gokhale, P. C., de Weck, A., Mansour, A. A., Oh, C., Shih, J., Hadi, K.,  
510 Rosen, Y., Bistline, J., Venkatesan, K., Reddy, A., Sonkin, D., Liu, M., Lehar, J., Korn, J. M.,  
511 Porter, D. A., Jones, M. D., Golji, J., Caponigro, G., Taylor, J. E., Dunning, C. M., Creech, A. L.,  
512 Warren, A. C., McFarland, J. M., Zamanighomi, M., Kauffmann, A., Stransky, N., Imielinski, M.,  
513 Maruvka, Y. E., Cherniack, A. D., Tsherniak, A., Vazquez, F., Jaffe, J. D., Lane, A. A., Weinstock,  
514 D. M., Johannessen, C. M., Morrissey, M. P., Stegmeier, F., Schlegel, R., Hahn, W. C., Getz, G.,  
515 Mills, G. B., Boehm, J. S., Golub, T. R., Garraway, L. A., and Sellers, W. R. (2019) Next-  
516 generation characterization of the Cancer Cell Line Encyclopedia. *Nature* **569**, 503-508
- 517 26. Uhlen, M., Fagerberg, L., Hallstrom, B. M., Lindskog, C., Oksvold, P., Mardinoglu, A., Sivertsson,  
518 A., Kampf, C., Sjostedt, E., Asplund, A., Olsson, I., Edlund, K., Lundberg, E., Navani, S., Szigartyo,  
519 C. A., Odeberg, J., Djureinovic, D., Takanen, J. O., Hober, S., Alm, T., Edqvist, P. H., Berling, H.,  
520 Tegel, H., Mulder, J., Rockberg, J., Nilsson, P., Schwenk, J. M., Hamsten, M., von Feilitzen, K.,  
521 Forsberg, M., Persson, L., Johansson, F., Zwahlen, M., von Heijne, G., Nielsen, J., and Ponten,  
522 F. (2015) Proteomics. Tissue-based map of the human proteome. *Science* **347**, 1260419
- 523 27. Ek-Vitorin, J. F., King, T. J., Heyman, N. S., Lampe, P. D., and Burt, J. M. (2006) Selectivity of  
524 connexin 43 channels is regulated through protein kinase C-dependent phosphorylation. *Circ Res*  
525 **98**, 1498-1505
- 526 28. Li, W., Hertzberg, E. L., and Spray, D. C. (2005) Regulation of connexin43-protein binding in  
527 astrocytes in response to chemical ischemia/hypoxia. *J Biol Chem* **280**, 7941-7948
- 528 29. Leithe, E., Mesnil, M., and Aasen, T. (2017) The connexin 43 C-terminus: A tail of many tales.  
529 *Biochim Biophys Acta*

- 530 30. Pridham, K. J., Le, L., Guo, S., Varghese, R. T., Algino, S., Liang, Y., Fajardin, R., Rodgers, C.  
531 M., Simonds, G. R., Kelly, D. F., and Sheng, Z. (2018) PIK3CB/p110beta is a selective survival  
532 factor for glioblastoma. *Neuro Oncol* **20**, 494-505
- 533 31. O'Quinn, M. P., Palatinus, J. A., Harris, B. S., Hewett, K. W., and Gourdie, R. G. (2011) A peptide  
534 mimetic of the connexin43 carboxyl terminus reduces gap junction remodeling and induced  
535 arrhythmia following ventricular injury. *Circ Res* **108**, 704-715
- 536 32. Chi, Y., Gao, K., Li, K., Nakajima, S., Kira, S., Takeda, M., and Yao, J. (2014) Purinergic control  
537 of AMPK activation by ATP released through connexin 43 hemichannels - pivotal roles in  
538 hemichannel-mediated cell injury. *J Cell Sci* **127**, 1487-1499
- 539 33. Ujiie, H., Chaytor, A. T., Bakker, L. M., and Griffith, T. M. (2003) Essential role of Gap junctions  
540 in NO- and prostanoid-independent relaxations evoked by acetylcholine in rabbit intracerebral  
541 arteries. *Stroke* **34**, 544-550
- 542 34. Fiori, M. C., Reuss, L., Cuello, L. G., and Altenberg, G. A. (2014) Functional analysis and  
543 regulation of purified connexin hemichannels. *Front Physiol* **5**, 71
- 544 35. Sasaki, T., Irie-Sasaki, J., Jones, R. G., Oliveira-dos-Santos, A. J., Stanford, W. L., Bolon, B.,  
545 Wakeham, A., Itie, A., Bouchard, D., Koziarzki, I., Joza, N., Mak, T. W., Ohashi, P. S., Suzuki,  
546 A., and Penninger, J. M. (2000) Function of PI3Kgamma in thymocyte development, T cell  
547 activation, and neutrophil migration. *Science* **287**, 1040-1046
- 548 36. Zhao, Y., Gao, J. L., Ji, J. W., Gao, M., Yin, Q. S., Qiu, Q. L., Wang, C., Chen, S. Z., Xu, J., Liang,  
549 R. S., Cai, Y. Z., and Wang, X. F. (2014) Cytotoxicity enhancement in MDA-MB-231 cells by the  
550 combination treatment of tetrahydropalmatine and berberine derived from *Corydalis yanhusuo* W.  
551 T. Wang. *J Intercult Ethnopharmacol* **3**, 68-72
- 552 37. Chen, L., Ye, H. L., Zhang, G., Yao, W. M., Chen, X. Z., Zhang, F. C., and Liang, G. (2014)  
553 Autophagy inhibition contributes to the synergistic interaction between EGCG and doxorubicin to  
554 kill the hepatoma Hep3B cells. *PloS one* **9**, e85771
- 555 38. Sagwal, S. K., Pasqual-Melo, G., Bodnar, Y., Gandhirajan, R. K., and Bekeschus, S. (2018)  
556 Combination of chemotherapy and physical plasma elicits melanoma cell death via upregulation  
557 of SLC22A16. *Cell Death Dis* **9**, 1179
- 558 39. Li, M., Liang, R. F., Wang, X., Mao, Q., and Liu, Y. H. (2017) BKM120 sensitizes C6 glioma cells  
559 to temozolomide via suppression of the PI3K/Akt/NF-kappaB/MGMT signaling pathway. *Oncol  
560 Lett* **14**, 6597-6603
- 561 40. Mateo, J., Ganji, G., Lemech, C., Burris, H. A., Han, S. W., Swales, K. E., Decordova, S.,  
562 DeYoung, M. P., Smith, D. A., Kalyana-Sundaram, S., Wu, J., Motwani, M., Kumar, R., Tolson, J.  
563 M., Rha, S. Y., Cheol Chung, H., Eder, J. P., Sharma, S., Bang, Y. J., Infante, J. R., Yan, L., de



- 564 Bono, J. S., and Arkenau, H. T. (2017) A first-time-in-human study of GSK2636771, a  
565 phosphoinositide 3 kinase beta-selective inhibitor, in patients with advanced solid tumors. *Clin*  
566 *Cancer Res*
- 567 41. Mulkeams-Hubert, E. E., Torre-Healy, L. A., Silver, D. J., Eurich, J. T., Bayik, D., Serbinowski, E.,  
568 Hitomi, M., Zhou, J., Przychodzen, B., Zhang, R., Sprowls, S. A., Hale, J. S., Alban, T. J.,  
569 Berezovsky, A., Bell, B. A., Lockman, P. R., Jha, B. K., and Lathia, J. D. (2019) Development of  
570 a Cx46 Targeting Strategy for Cancer Stem Cells. *Cell Rep* **27**, 1062-1072 e1065
- 571 42. Hitomi, M., Deleyrolle, L. P., Mulkeams-Hubert, E. E., Jarrar, A., Li, M., Sinyuk, M., Otvos, B.,  
572 Brunet, S., Flavahan, W. A., Hubert, C. G., Goan, W., Hale, J. S., Alvarado, A. G., Zhang, A.,  
573 Rohaus, M., Oli, M., Vedam-Mai, V., Fortin, J. M., Futch, H. S., Griffith, B., Wu, Q., Xia, C. H.,  
574 Gong, X., Ahluwalia, M. S., Rich, J. N., Reynolds, B. A., and Lathia, J. D. (2015) Differential  
575 connexin function enhances self-renewal in glioblastoma. *Cell Rep* **11**, 1031-1042
- 576 43. Jimenez, T., Fox, W. P., Naus, C. C., Galipeau, J., and Belliveau, D. J. (2006) Connexin over-  
577 expression differentially suppresses glioma growth and contributes to the bystander effect  
578 following HSV-thymidine kinase gene therapy. *Cell Commun Adhes* **13**, 79-92
- 579 44. Goldberg, G. S., Bechberger, J. F., Tajima, Y., Merritt, M., Omori, Y., Gawinowicz, M. A.,  
580 Narayanan, R., Tan, Y., Sanai, Y., Yamasaki, H., Naus, C. C., Tsuda, H., and Nicholson, B. J.  
581 (2000) Connexin43 suppresses MFG-E8 while inducing contact growth inhibition of glioma cells.  
582 *Cancer Res* **60**, 6018-6026
- 583 45. Yoshimura, T., Satake, M., Ohnishi, A., Tsutsumi, Y., and Fujikura, Y. (1998) Mutations of  
584 connexin32 in Charcot-Marie-Tooth disease type X interfere with cell-to-cell communication but  
585 not cell proliferation and myelin-specific gene expression. *J Neurosci Res* **51**, 154-161
- 586 46. Arun, S., Ravisankar, S., and Vanisree, A. J. (2017) Implication of connexin30 on the stemness  
587 of glioma: connexin30 reverses the malignant phenotype of glioma by modulating IGF-1R, CD133  
588 and cMyc. *J Neurooncol* **135**, 473-485
- 589 47. Arun, S., Vanisree, A. J., and Ravisankar, S. (2016) Connexin 30 downregulates Insulin-like  
590 growth factor receptor-1, abolishes Erk and potentiates effects of an IGF-R inhibitor in a glioma  
591 cell line. *Brain Res* **1643**, 80-90
- 592 48. Artesi, M., Kroonen, J., Bredel, M., Nguyen-Khac, M., Deprez, M., Schoysman, L., Poulet, C.,  
593 Chakravarti, A., Kim, H., Scholtens, D., Seute, T., Rogister, B., Bours, V., and Robe, P. A. (2015)  
594 Connexin 30 expression inhibits growth of human malignant gliomas but protects them against  
595 radiation therapy. *Neuro Oncol* **17**, 392-406
- 596 49. Cotrina, M. L., Lin, J. H., and Nedergaard, M. (2008) Adhesive properties of connexin  
597 hemichannels. *Glia* **56**, 1791-1798

- 598 50. Fu, C. T., Bechberger, J. F., Ozog, M. A., Perbal, B., and Naus, C. C. (2004) CCN3 (NOV)  
599 interacts with connexin43 in C6 glioma cells: possible mechanism of connexin-mediated growth  
600 suppression. *J Biol Chem* **279**, 36943-36950
- 601 51. Naus, C. C., Elisevich, K., Zhu, D., Belliveau, D. J., and Del Maestro, R. F. (1992) In vivo growth  
602 of C6 glioma cells transfected with connexin43 cDNA. *Cancer research* **52**, 4208-4213
- 603 52. Soroceanu, L., Manning, T. J., Jr., and Sontheimer, H. (2001) Reduced expression of connexin-  
604 43 and functional gap junction coupling in human gliomas. *Glia* **33**, 107-117
- 605 53. Aasen, T., Mesnil, M., Naus, C. C., Lampe, P. D., and Laird, D. W. (2016) Gap junctions and  
606 cancer: communicating for 50 years. *Nat Rev Cancer* **16**, 775-788
- 607 54. Kanabur, P., Guo, S., Simonds, G. R., Kelly, D. F., Gourdie, R. G., Verbridge, S. S., and Sheng,  
608 Z. (2016) Patient-derived glioblastoma stem cells respond differentially to targeted therapies.  
609 *Oncotarget* **7**, 86406-86419
- 610 55. Sheng, K. L., Pridham, K. J., Sheng, Z., Lamouille, S., and Varghese, R. T. (2018) Functional  
611 Blockade of Small GTPase RAN Inhibits Glioblastoma Cell Viability. *Front Oncol* **8**, 662
- 612 56. Varghese, R. T., Young, S., Pham, L., Liang, Y., Pridham, K. J., Guo, S., Murphy, S., Kelly, D. F.,  
613 and Sheng, Z. (2018) Casein Kinase 1 Epsilon Regulates Glioblastoma Cell Survival. *Sci Rep* **8**,  
614 13621
- 615 57. Roberts, R., Smyth, J. W., Will, J., Roberts, P., Grek, C. L., Ghatnekar, G. S., Sheng, Z., Gourdie,  
616 R. G., Lamouille, S., and Foster, E. J. (2020) Development of PLGA nanoparticles for sustained  
617 release of a connexin43 mimetic peptide to target glioblastoma cells. *Mater Sci Eng C Mater Biol*  
618 *Appl* **108**, 110191
- 619 58. Sheng, Z., Lewis, J. A., and Chirico, W. J. (2004) Nuclear and nucleolar localization of 18-kDa  
620 fibroblast growth factor-2 is controlled by C-terminal signals. *J Biol Chem* **279**, 40153-40160
- 621 59. Sheng, Z., Liang, Y., Lin, C. Y., Comai, L., and Chirico, W. J. (2005) Direct regulation of rRNA  
622 transcription by fibroblast growth factor 2. *Mol Cell Biol* **25**, 9419-9426
- 623 60. Guo, S., Liang, Y., Murphy, S. F., Huang, A., Shen, H., Kelly, D. F., Sobrado, P., and Sheng, Z.  
624 (2015) A rapid and high content assay that measures cyto-ID-stained autophagic compartments  
625 and estimates autophagy flux with potential clinical applications. *Autophagy* **11**, 560-572
- 626

## Connexin 43 confers chemoresistance through activating PI3K

Kevin J Pridham<sup>1</sup>, Farah Shah<sup>1,3</sup>, Kevin L Sheng<sup>2</sup>, Sujuan Guo<sup>1</sup>, Min Liu<sup>1</sup>, Pratik Kanabur<sup>1,3</sup>, Samy Lamouille<sup>1,4,5</sup>, Gabrielle Lewis<sup>1</sup>, Marc Morales<sup>1</sup>, Jane Jourdan<sup>1</sup>, Christina L Grek<sup>6</sup>, Gautam G Ghatnekar<sup>6</sup>, Robin Varghese<sup>2</sup>, Deborah F Kelly<sup>7,8,9</sup>, Robert G Gourdie<sup>1,10,11\*</sup>, and Zhi Sheng<sup>1,3,11\*</sup>

### Supplemental Data

#### Supplemental Table S1

| Gene symbol  | Gene full name                | Alias         | Abbreviations |
|--------------|-------------------------------|---------------|---------------|
| <b>GJA1</b>  | Gap junction protein alpha 1  | Connexin 43   | <b>Cx43</b>   |
| <b>GJA3</b>  | Gap junction protein alpha 3  | Connexin 46   | <b>Cx46</b>   |
| <b>GJA4</b>  | Gap junction protein alpha 4  | Connexin 37   | <b>Cx37</b>   |
| <b>GJA5</b>  | Gap junction protein alpha 5  | Connexin 40   | <b>Cx40</b>   |
| <b>GJA8</b>  | Gap junction protein alpha 8  | Connexin 50   | <b>Cx50</b>   |
| <b>GJA9</b>  | Gap junction protein alpha 9  | Connexin 58   | <b>Cx58</b>   |
| <b>GJA10</b> | Gap junction protein alpha 10 | Connexin 62   | <b>Cx62</b>   |
| <b>GJB1</b>  | Gap junction protein beta 1   | Connexin 32   | <b>Cx32</b>   |
| <b>GJB2</b>  | Gap junction protein beta 2   | Connexin 26   | <b>Cx26</b>   |
| <b>GJB3</b>  | Gap junction protein beta 3   | Connexin 31   | <b>Cx31</b>   |
| <b>GJB4</b>  | Gap junction protein beta 4   | Connexin 30.3 | <b>Cx30.3</b> |
| <b>GJB5</b>  | Gap junction protein beta 5   | Connexin 31.1 | <b>Cx31.1</b> |
| <b>GJB6</b>  | Gap junction protein beta 6   | Connexin 30   | <b>Cx30</b>   |
| <b>GJB7</b>  | Gap junction protein beta 7   | Connexin 25   | <b>Cx25</b>   |
| <b>GJC1</b>  | Gap junction protein gamma 1  | Connexin 45   | <b>Cx45</b>   |
| <b>GJC2</b>  | Gap junction protein gamma 2  | Connexin 47   | <b>Cx47</b>   |
| <b>GJC3</b>  | Gap junction protein gamma 3  | Connexin 30.2 | <b>Cx30.2</b> |
| <b>GJD2</b>  | Gap junction protein delta 2  | Connexin 36   | <b>Cx36</b>   |
| <b>GJD3</b>  | Gap junction protein delta 3  | Connexin 31.9 | <b>Cx31.9</b> |
| <b>GJD4</b>  | Gap junction protein delta 4  | Connexin 40.1 | <b>Cx40.1</b> |

**Supplemental Table S1. Nomenclature of connexins.** Information regarding gene symbols and aliases was retrieved from GeneCards (<https://www.genecards.org>).

## Supplemental Table S2

| Cell lines | Cx43 | pAKT-S473 | p110 $\beta$ | MGMT | TMZ IC50 ( $\mu$ M) |
|------------|------|-----------|--------------|------|---------------------|
| SF295      | 1.4  | 2.0       | 0.5          | No   | 500                 |
| U87MG      | 3.2  | 2.2       | 0.7          | No   | 1000                |
| A172       | 0.5  | 0.1       | 0.4          | No   | 30                  |
| LN229      | 0.5  | 0.0       | 0.2          | No   | 20                  |
| SF268      | 0.7  | 0.1       | 0.3          | No   | 20                  |
| SNB75      | 0.9  | 0.2       | 0.2          | No   | 293                 |

**Supplemental Table S2. Levels of Cx43, pAKT-S473, p110 $\beta$ , MGMT and TMZ IC50.** Data were retrieved from our previous publications (21, 30).

Supplemental Fig. S1

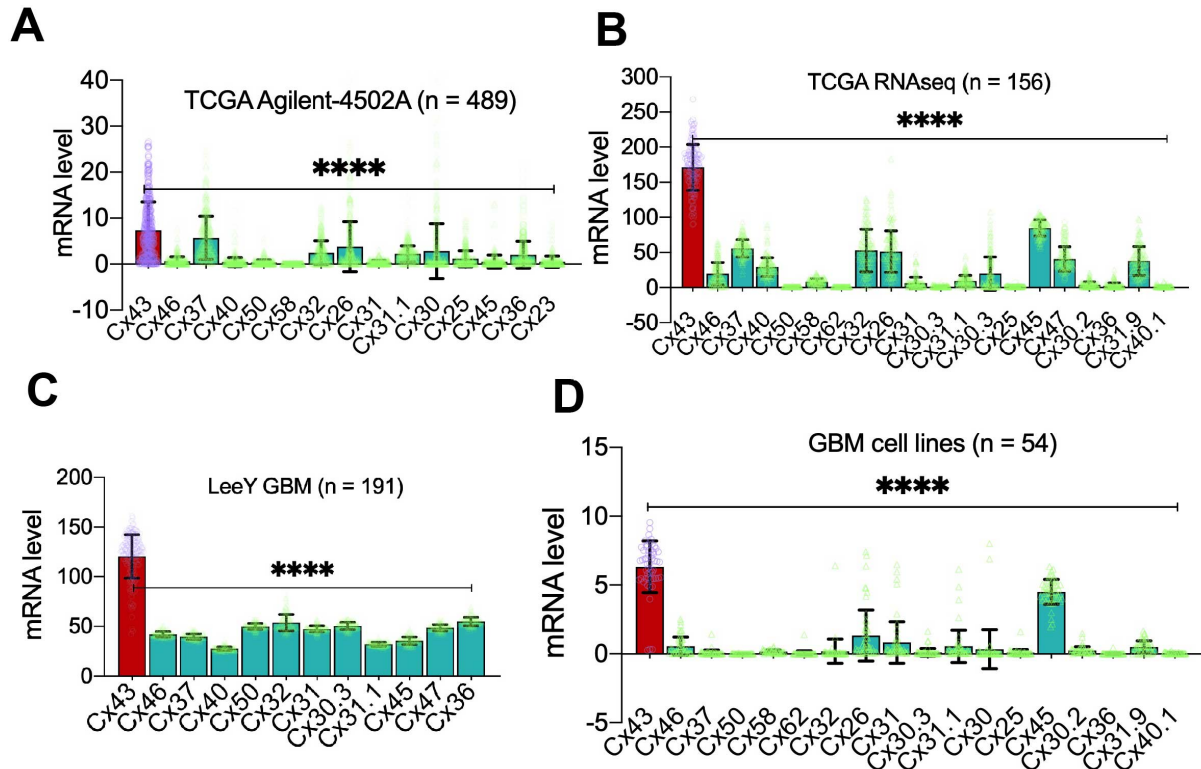

**Supplemental Fig. S1. mRNA levels of connexins in GBM.** Gene expression data were retrieved from cBioPortal, GlioVis, or the Cancer Dependency Map (DepMap). Shown are mRNA levels of connexins in the TCGA Agilent-4502A microarray (**A**), the TCGA RNAseq (**B**), the LeeY GBM dataset (**C**), and DepMap GBM cell lines (**D**). Case numbers (n) are also shown. Error bars represent standard deviations. Cx43 is highlighted in red and other connexins are in green. Individual data points are also shown (purple for Cx43 and yellow for other connexins). *P* values were obtained using One-Way ANOVA \*\*\*\*: *P* < 0.0001.

**Supplemental Fig. S2**

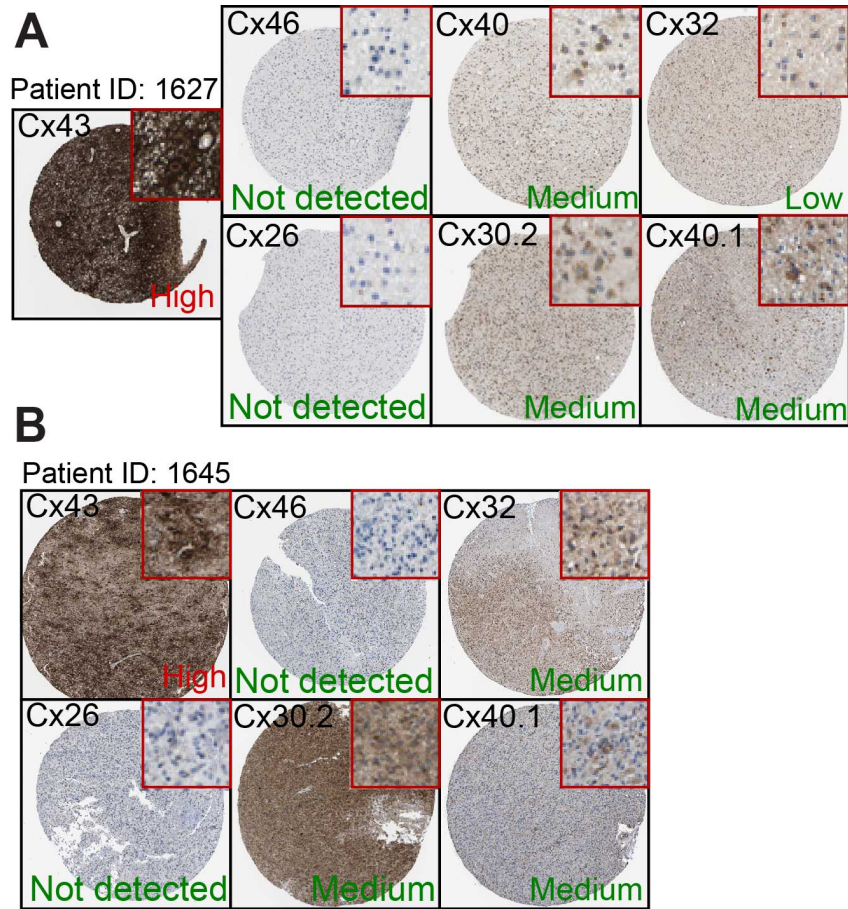

**Supplemental Fig. S2. Levels of connexins in high-grade glioma.** Immunohistochemical staining images of high-grade glioma were retrieved the Human Protein Atlas. Images of two patient specimens are shown in **A** and **B**, respectively. Inset figures depict details of immunostaining. Levels of staining are highlighted in red (Cx43) or in green (other connexins).

Supplemental Fig. S3

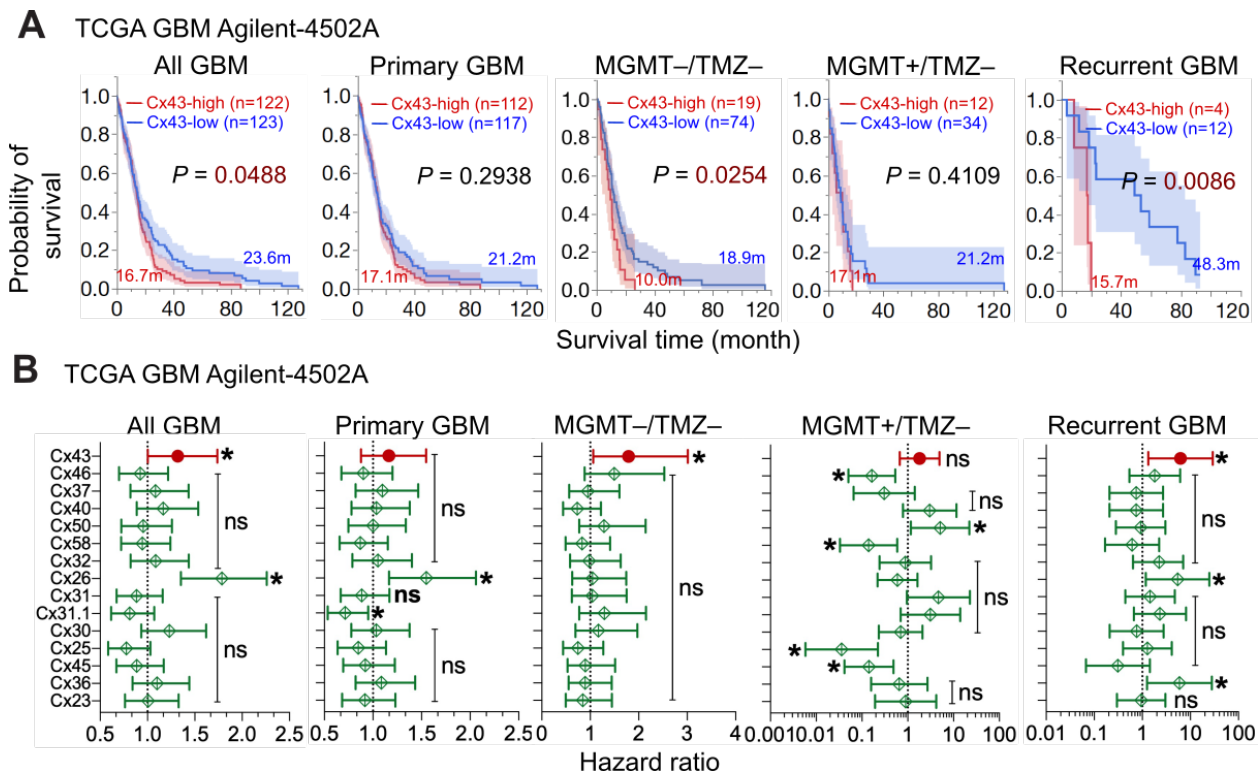

**Supplemental Fig. S3. Kaplan-Meier analysis and Cox univariate analysis in the TCGA Agilent-4502A dataset.** Data were retrieved from cBioportal. Patients were divided into Cx43-high (red, top 25 percentile) and Cx43-low (blue, bottom 25 or 75 percentile) based upon Cx43 mRNA levels in primary, secondary, and recurrent GBM (All GBM), primary GBM only (Primary GBM), MGMT-deficient/TMZ-untreated primary GBM (MGMT-/TMZ-), MGMT-expressing/TMZ-untreated primary GBM (MGMT+/TMZ-), or recurrent GBM only (Recurrent GBM). Kaplan-Meier analysis (**A**) and Cox univariate analysis (**B**) were used. Case number (n), average survival time in months (m), 95% CI (shadow), long-rank *P* values, and hazard ratios are shown. \*: *P* < 0.05. ns: not significant.

## Supplemental Figure S4

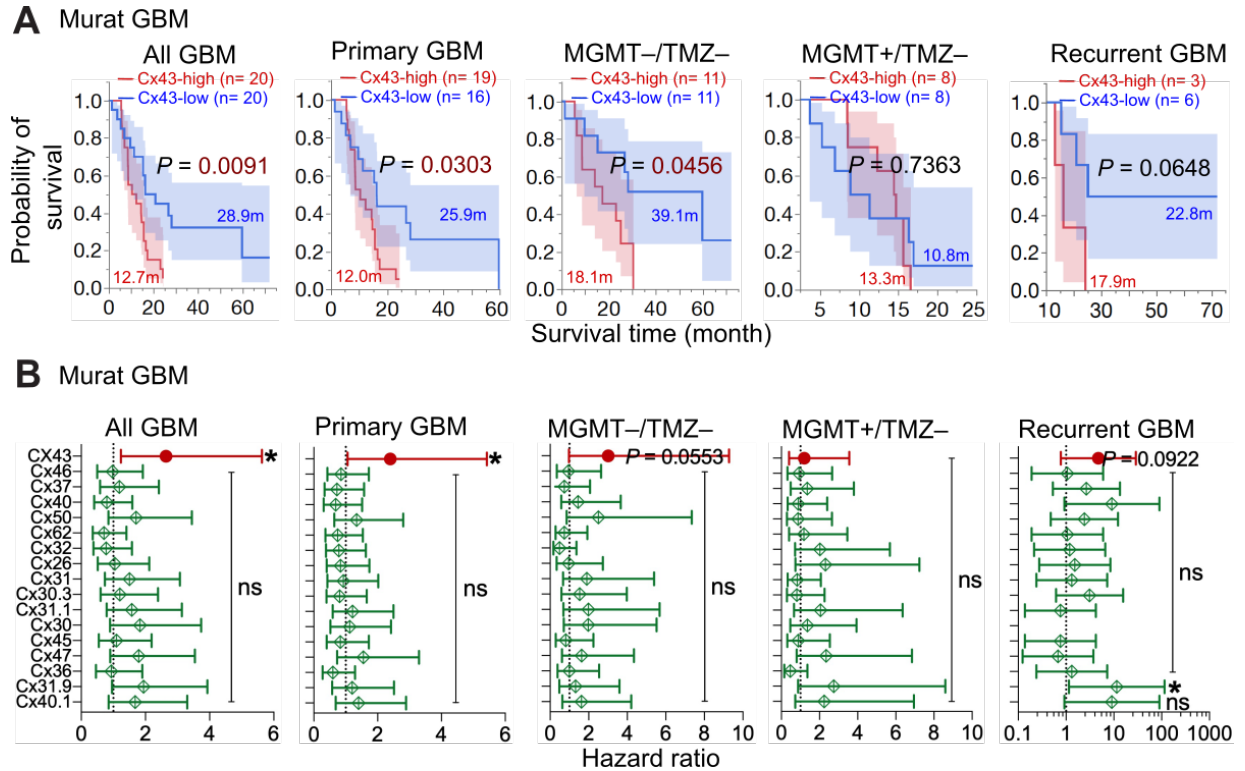

**Supplemental Fig. S4. Kaplan-Meier analysis and Cox univariate analysis in the Murat GBM dataset.** Data were retrieved from GlioVis. Patients were divided into Cx43-high (red, top 25 percentile) and Cx43-low (blue, bottom 25 or 75 percentile) based upon Cx43 mRNA levels in primary, secondary, and recurrent GBM (All GBM), primary GBM only (Primary GBM), MGMT-deficient/TMZ-untreated primary GBM (MGMT-/TMZ-), MGMT-expressing/TMZ-untreated primary GBM (MGMT+/TMZ-), or recurrent GBM only (Recurrent GBM). Kaplan-Meier analysis (**A**) and Cox univariate analysis (**B**) were used. Case number (n), average survival time in months (m), 95% CI (shadow), long-rank *P* values, and hazard ratios are shown. \*: *P* < 0.05. ns: not significant.



Supplemental Fig. S5

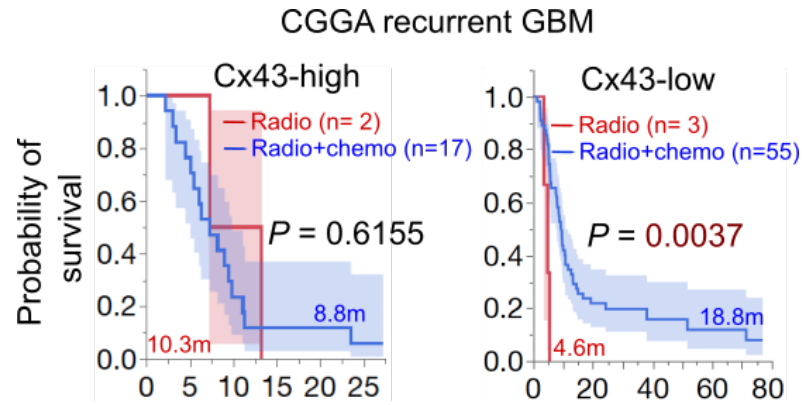

**Supplemental Fig. S5. Kaplan-Meier analysis in the CGGA recurrent GBM dataset.** Data were retrieved from the CGGA data portal. Cx43-high (top 25 percentile) or Cx43-low (bottom 75 percentile) patients were divided into Radio (red, treated with radiation only) or Radio+chemo (blue, treated with radiation and chemotherapy) based on Cx43 mRNA levels in recurrent GBMs. Case number (n), average survival time in months (m), long-rank  $P$  values, and hazard ratios are shown. \*:  $P < 0.05$  and ns: not significant.

Supplemental Fig. S6

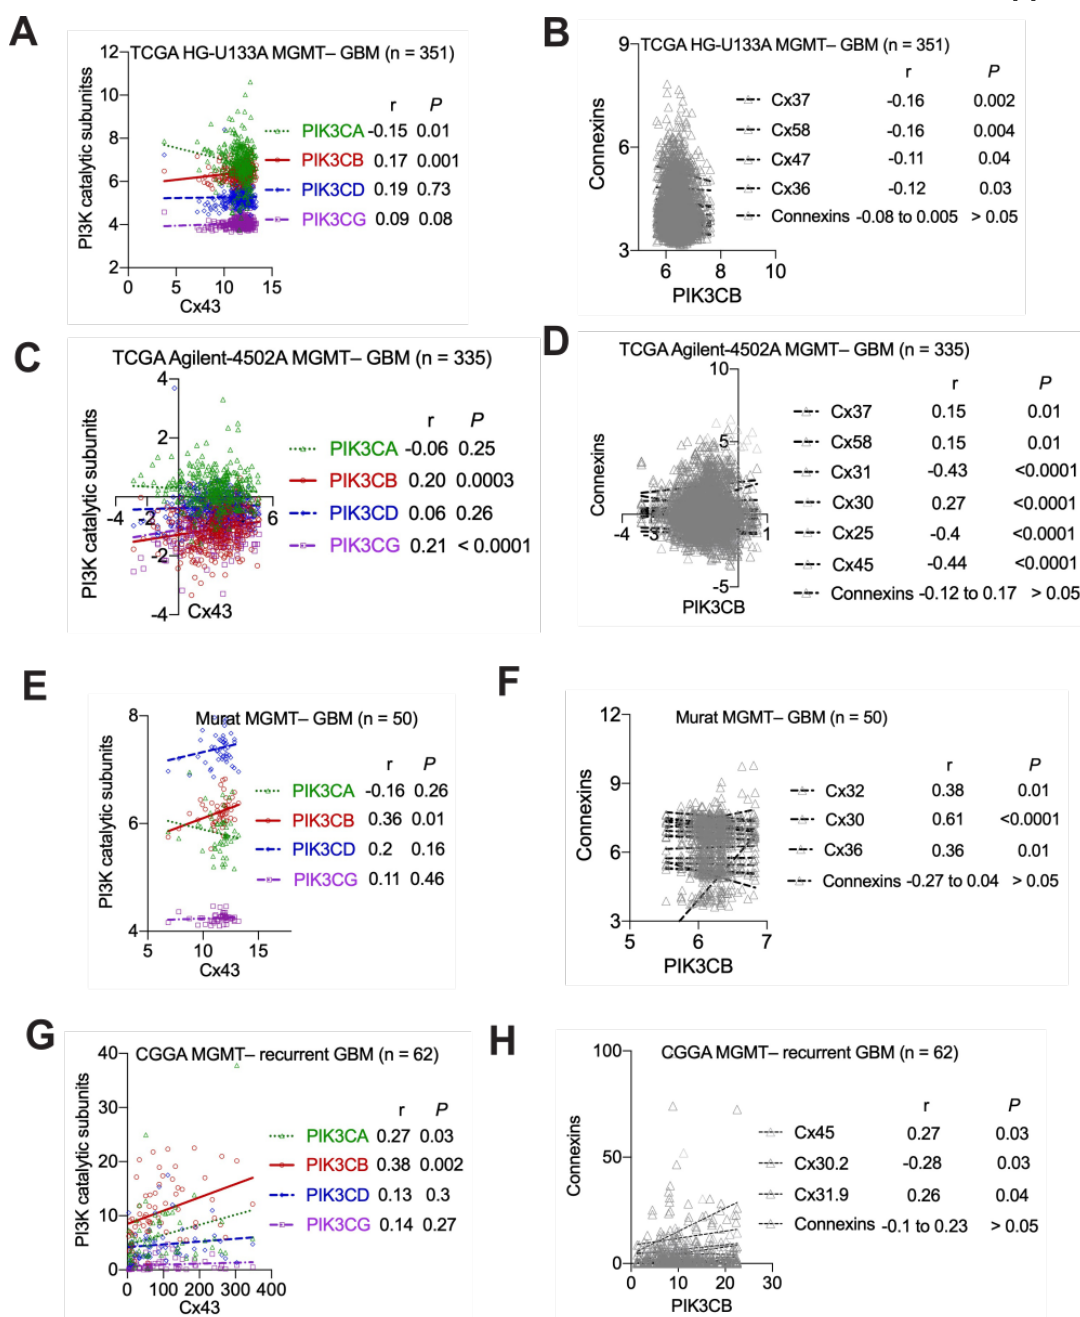

**Supplemental Fig. S6. Correlation between connexins and PI3K catalytic subunits.** Gene expression data were analyzed using the Pearson correlation coefficient assay. mRNA levels of Cx43 were compared to mRNA levels of PI3K catalytic subunits (**A**, **C**, **E**, and **G**) in four different datasets as indicated. mRNA levels of PIK3CB were compared to those of connexin mRNAs (**B**, **D**, **F**, and **H**). The coefficient *r* and corresponding *P* values are shown.

Supplemental Fig. S7

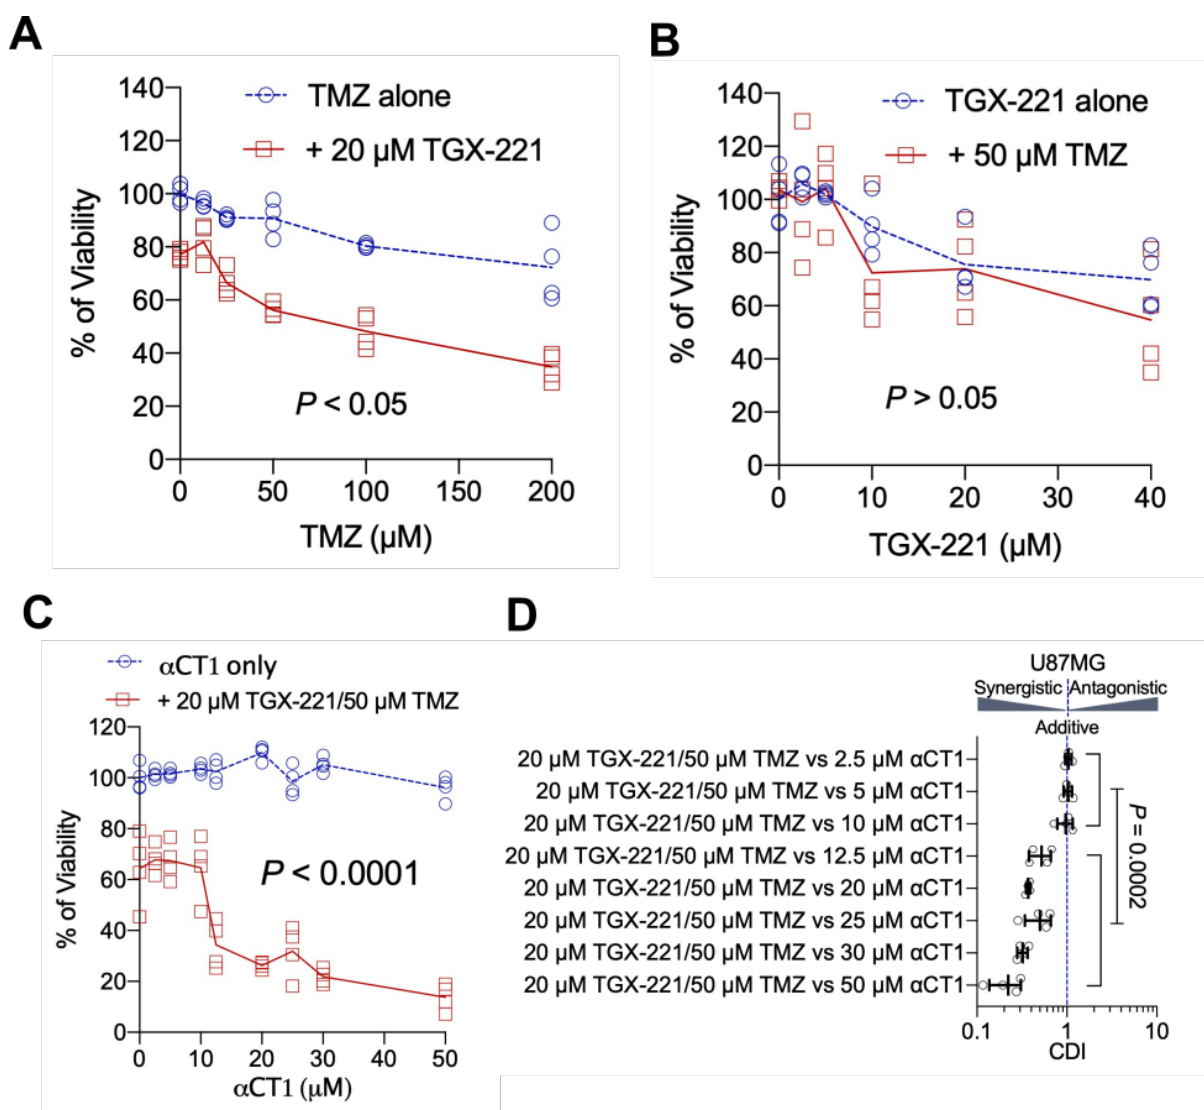

**Supplemental Fig. S7. Optimization of  $\alpha\text{CT1}$ , TGX-221 and TMZ in U87MG cells. (A)** Combination of 20  $\mu\text{M}$  TGX-221 and TMZ at various concentrations. U87MG cells were treated with drug combinations as indicated for 6 days. Cell viability was determined using the MTS viability assay. The vehicle DMSO was the control and set as 100%. Treated cells were normalized to DMSO-treated cells. **(B)** Combination of 50  $\mu\text{M}$  TMZ and TGX-221 at various concentrations. **(C)** Combination of 20  $\mu\text{M}$  TGX-221/50  $\mu\text{M}$  TMZ and  $\alpha\text{CT1}$  at different concentrations. **(D)** CDIs of different combinations tested in **C**. One-way ANOVA and student  $t$  test were used to determine statistical significance.

Supplemental Fig. S8

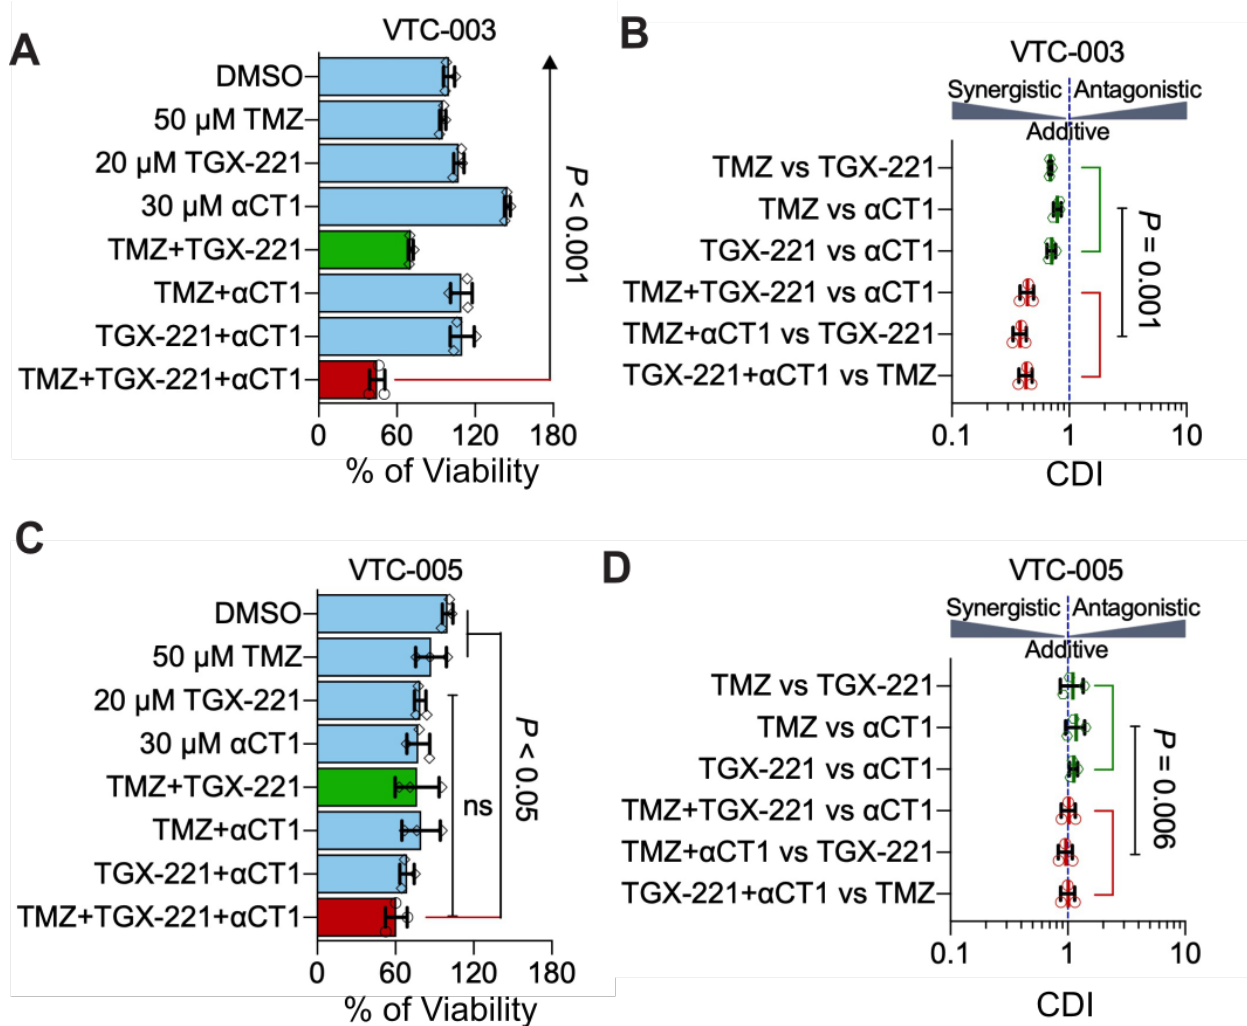

**Supplemental Fig. S8. The  $\alpha$ CT1/TGX combo in VTC-003 and VTC-005.** (A) Viability of VTC-003 cells treated with different drug combinations for 6 days. Cell viability was determined using the MTS viability assay. (B) CDIs of drug combinations tested in VTC-003 cells. (C) Viability of VTC-005 cells treated with different drug combinations. (D) CDIs of drug combinations tested in VTC-005. One-way ANOVA or student *t* test were used to determine statistical significance.

Supplemental Fig. S9

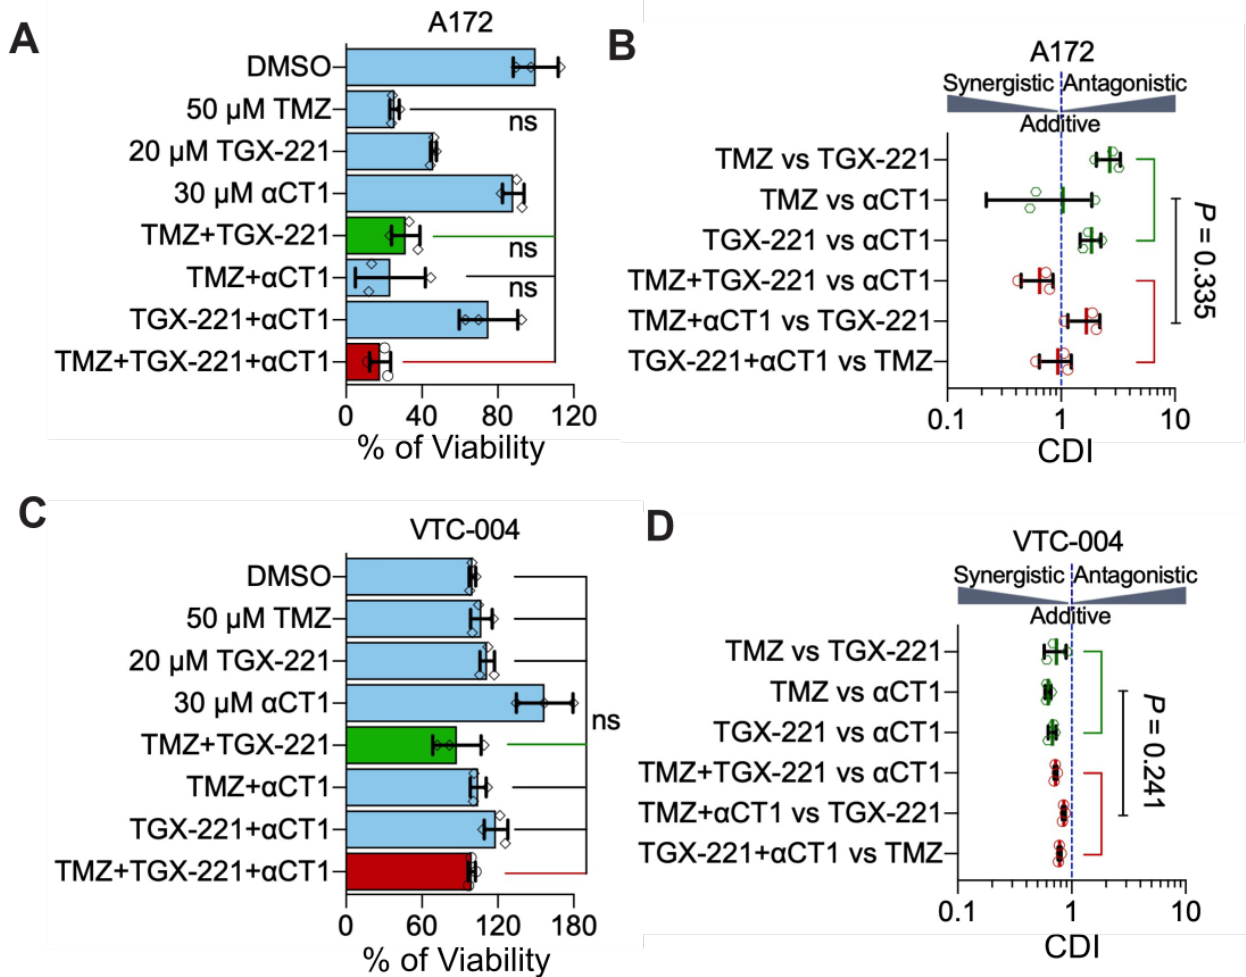

**Supplemental Fig. S9. The αCT1/TGX combo in A172 and VTC-004.** (A) Viability of A172 cells treated with different drug combinations for 6 days. Cell viability was determined using the MTS viability assay. (B) CDIs of drug combinations tested in A172. (C) Viability of VTC-004 cells treated with different drug combinations. (D) CDIs of drug combinations tested in VTC-004. One-way ANOVA or student *t* test were used to determine statistical significance.

Supplemental Fig. S10

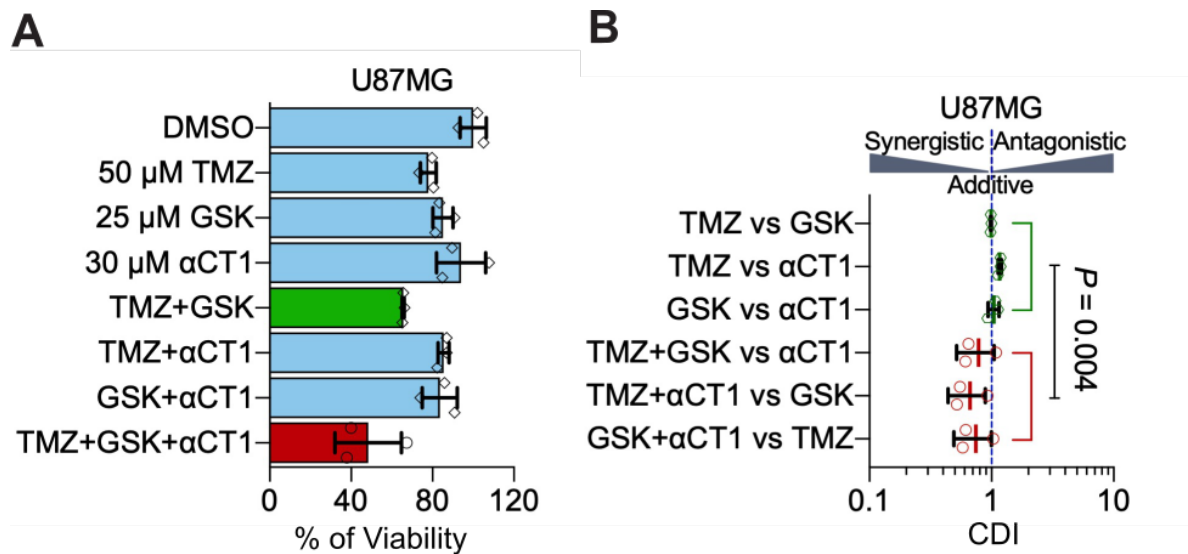

**Supplemental Fig. S10. The  $\alpha$ CT1/GSK combo in U87MG cells.** (A) Viability of U87MG cells treated with different combinations of drugs. GSK: GSK2636771 for 6 days. Cell viability was determined using the MTS viability assay. (B) CDIs of drug combinations tested in U87MG. Student *t* test were used to determine statistical significance.
